# Supplementary material
Source: PubMed Central journal article supplement (PMC6080128)
Supplement: mmc1.pdf [file mmc1.pdf]

YMTHE, Volume 26

## **Supplemental Information**

### **Single Intramuscular Injection of AAV-shRNA**

### **Reduces DNM2 and Prevents Myotubular**

### **Myopathy in Mice**

**Hichem Tasmaout, Valentina M. Lionello, Christine Kretz, Pascale Koebel, Nadia Messaddeq, Deborah Bitz, Jocelyn Laporte, and Belinda S. Cowling**

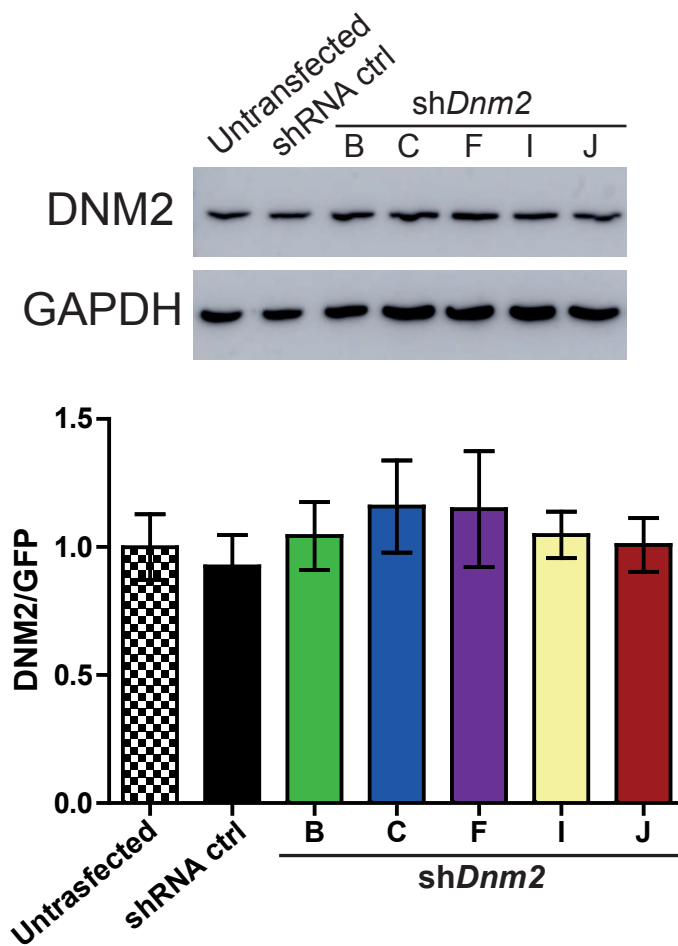

**Supplemental figure S1: *In vitro* validation of shRNA targeting *Dnm2*.**

Representative western blot from shRNA-treated C2C12 mouse myoblast. Cells were electroporated with shRNA ctrl, or sh*Dnm2* (B, C, F, I or J). DNM2 protein levels was determined by densitometry and standardized to GAPDH. *n*=3 per each group. Data represent an average of three independent experiments  $\pm$  SEM.

*Mtm1*KO muscle injected with sh*Dnm2* #C

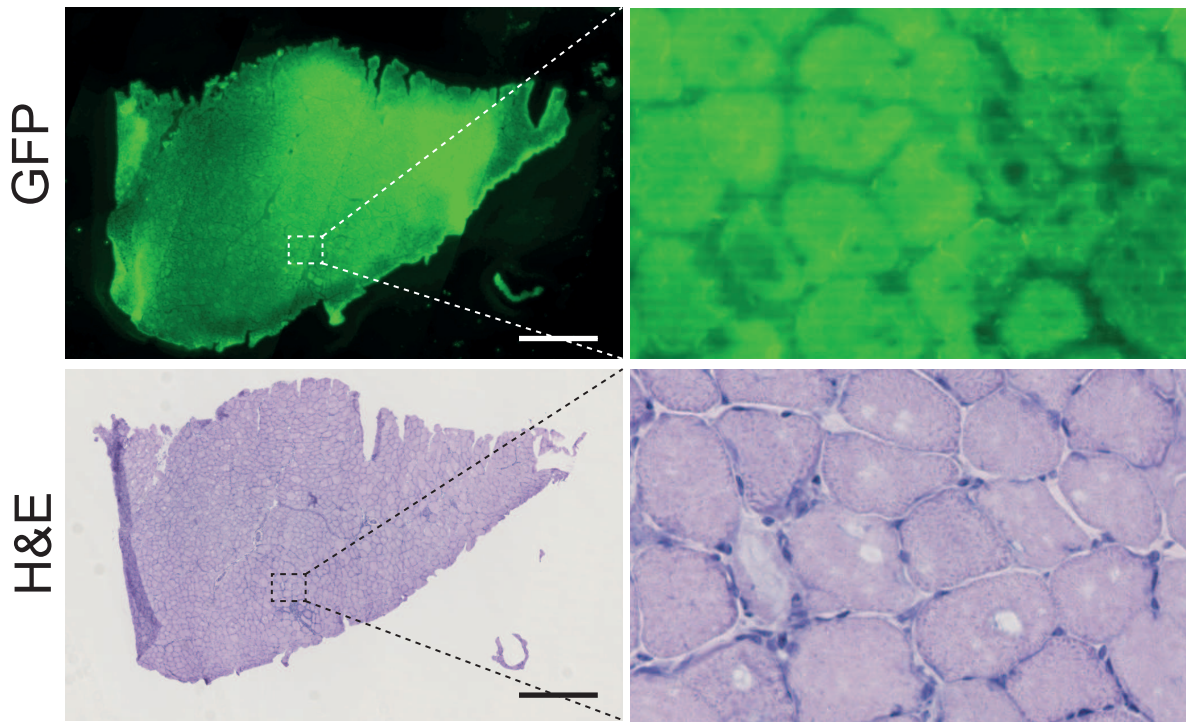

**Supplemental figure S2: GFP expression and H&E staining of serial sections at 4 weeks after AAV-sh*Dnm2* injection.** Heterogeneous GFP expression was visualized on 8 $\mu$ m TA cross section of 7-weeks old *Mtm1*KO.

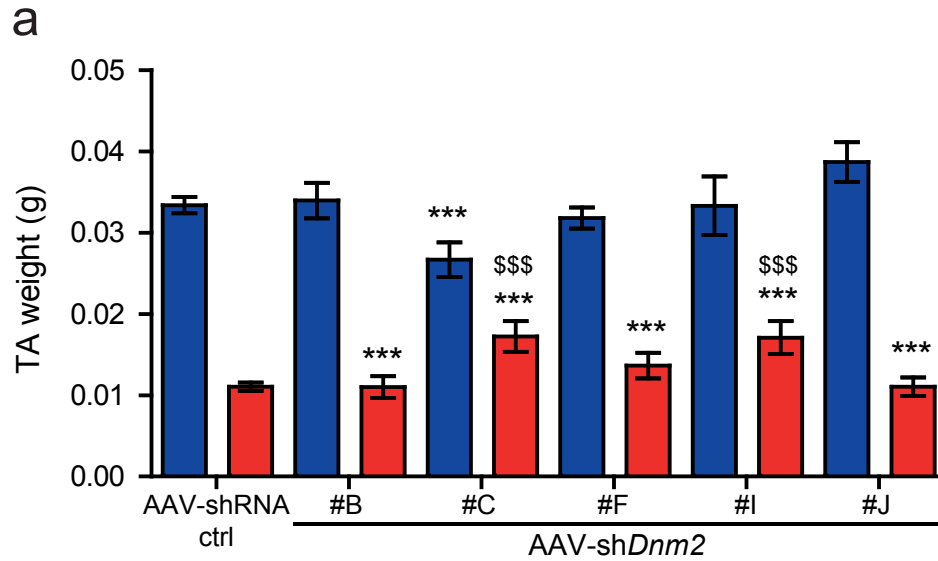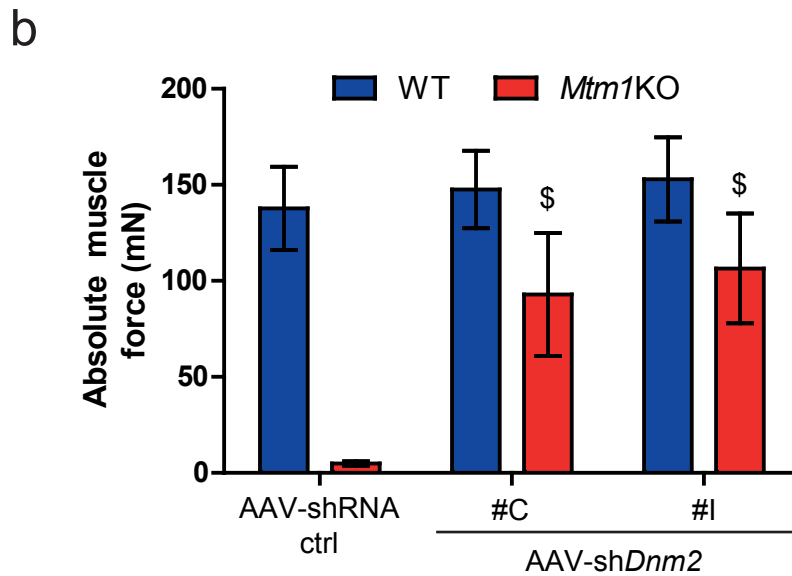

**Supplemental Figure S3: Positive effects of AAV shRNA-mediated *Dnm2* knockdown on *Mtm1KO* muscle mass and absolute force.**

4 weeks after AAV-sh*Dnm2* #C or #I injections, improvements in absolute muscle mass (a) and muscle maximal force (measured at 150 Hz) (b) were noted in *Mtm1KO* muscles. n=5-7 mice/group, \*\*\*p<0.001 vs WT TA treated with shRNA ctrl. \$p<0.05, \$\$\$p<0.01 *Mtm1KO* treated with AAV-sh*Dnm2* vs *Mtm1KO* treated with AAV-shRNA ctrl (ANOVA test).

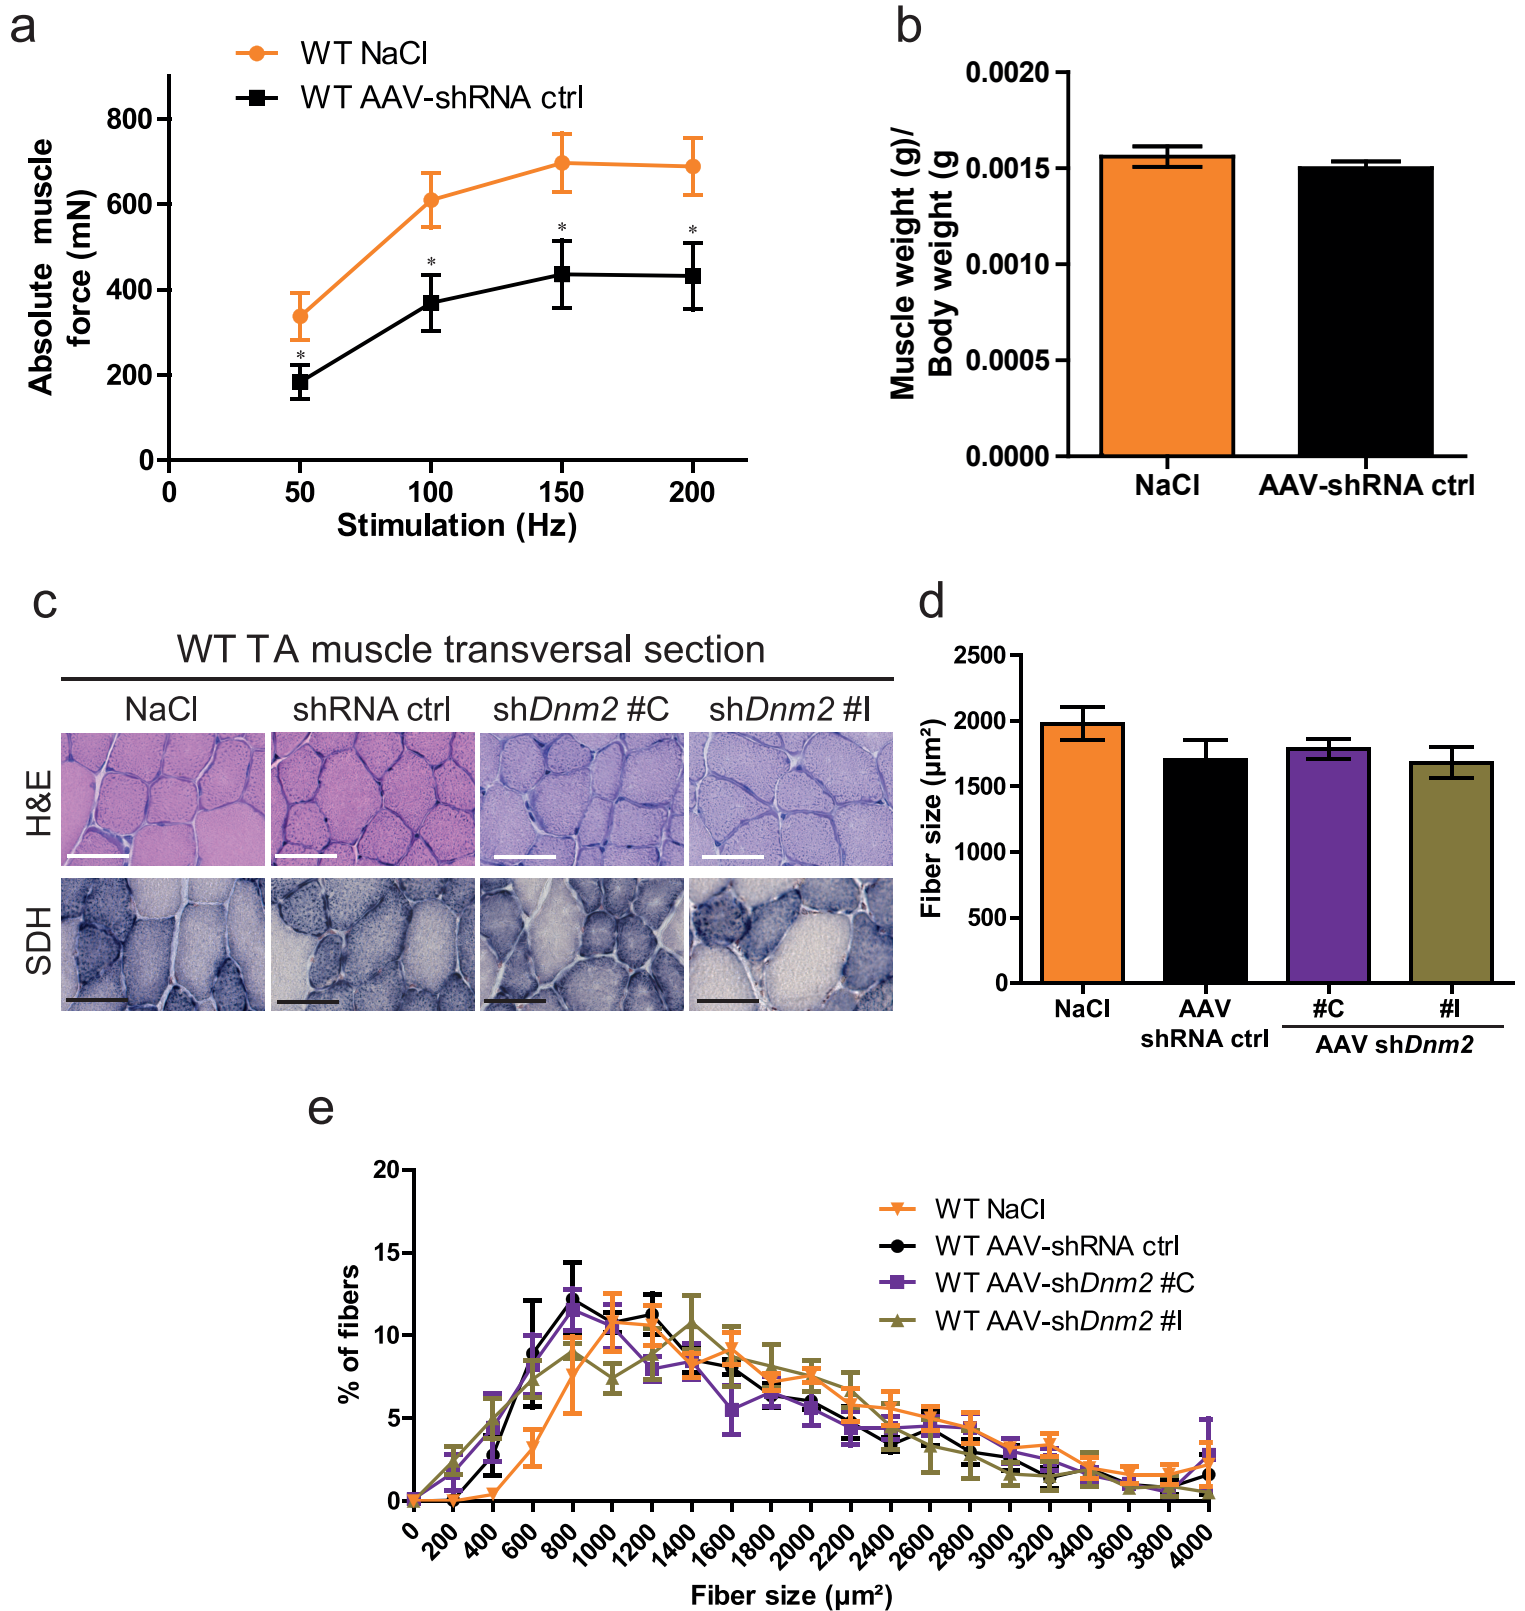

**Supplemental figure S4: Characterization of AAV-shRNA ctrl and AAV-shDnm2 impact on muscle mass, force and histology.** (a) TA muscle of WT mice treated with NaCl or AAV-shRNA ctrl were weighed 4 weeks after a single injection. (b) Absolute muscle forces of TA muscle were recorded after sciatic nerve stimulation with 50, 100, 150 and 200Hz.  $n=5-7$  mice/group. (c) TA muscle sections of WT mice treated with AAV-shRNA ctrl, AAV-shDnm2 (#C or #I) or NaCl were stained with H&E and SDH to visualize fiber size, shape, nuclei positioning and mitochondrial distribution (scale bars: 50 $\mu$ m). (d) Myofiber area was calculated on 300-400 fibers per sample. (e) Fiber size distribution of WT TA muscles according to size groups.  $n=5$  mice/group. \* $p<0.05$  vs WT TA treated with NaCl ( $t$ -test).
