# Supplementary material
Source: PubMed Central journal article supplement (PMC6080128)
Supplement: mmc2.pdf [file mmc2.pdf]

# Single Intramuscular Injection of AAV-shRNA Reduces DNM2 and Prevents Myotubular Myopathy in Mice

Hichem Tasfaout,<sup>1,2,3,4</sup> Valentina M. Lionello,<sup>1,2,3,4</sup> Christine Kretz,<sup>1,2,3,4</sup> Pascale Koebel,<sup>2,3,4</sup> Nadia Messaddeq,<sup>2,3,4,6</sup> Deborah Bitz,<sup>2,3,4,5</sup> Jocelyn Laporte,<sup>1,2,3,4,7</sup> and Belinda S. Cowling<sup>1,2,3,4,7</sup>

<sup>1</sup>Institut de Génétique et de Biologie Moléculaire et Cellulaire (IGBMC), Illkirch 67400, France; <sup>2</sup>INSERM U964, Illkirch 67400, France; <sup>3</sup>CNRS UMR7104, Illkirch 67400, France; <sup>4</sup>Strasbourg University, Illkirch 67400, France; <sup>5</sup>Celphedia, Phenomin, Institut Clinique de la Souris (ICS), Illkirch 67400, France; <sup>6</sup>Imaging Center, Institut de Génétique et de Biologie Moléculaire et Cellulaire (IGBMC), Illkirch 67400, France

**Myotubular myopathy, or X-linked centronuclear myopathy, is a severe muscle disorder representing a significant burden for patients and their families. It is clinically characterized by neonatal and severe muscle weakness and atrophy. Mutations in the myotubularin (*MTM1*) gene cause myotubular myopathy, and no specific curative treatment is available. We previously found that dynamin 2 (DNM2) is upregulated in both *Mtm1* knockout and patient muscle samples, whereas its reduction through antisense oligonucleotides rescues the clinical and histopathological features of this myopathy in mice. Here, we propose a novel approach targeting *Dnm2* mRNA. We screened and validated *in vitro* and *in vivo* several short hairpin RNA (shRNA) sequences that efficiently target *Dnm2* mRNA. A single intramuscular injection of AAV-sh*Dnm2* resulted in long-term reduction of DNM2 protein level and restored muscle force, mass, histology, and myofiber ultrastructure and prevented molecular defects linked to the disease. Our results demonstrate a robust DNM2 knockdown and provide an alternative strategy based on reduction of DNM2 to treat myotubular myopathy.**

## INTRODUCTION

Centronuclear myopathies (CNMs) are a group of rare congenital disorders characterized clinically by severe muscle atrophy and generalized muscle weakness.<sup>1,2</sup> Muscle biopsies from affected patients present numerous myofibers with nuclei abnormally located at the center, without excessive regeneration. Different forms of CNM have been characterized to date. The most common and severe form is the X-linked CNM (XLCNM), also called myotubular myopathy.<sup>3</sup> XLCNM patients present with severe hypotonia and respiratory distress at birth, strongly impacting on life expectancy. More than 200 mutations in *MTM1* have been identified to cause XLCNM, most of them leading to a strong decrease or absence of the MTM1 protein.<sup>4–9</sup> MTM1 is a phosphoinositide phosphatase involved in key cellular processes, including endosomal trafficking,<sup>10</sup> excitation contraction coupling,<sup>11,12</sup> intermediate filament organization,<sup>13</sup> neuromuscular junction (NMJ) structure,<sup>14,15</sup> satellite cell proliferation,<sup>16</sup> apoptosis,<sup>16,17</sup> and autophagy.<sup>18,19</sup> Mutations in *DNM2* have

been associated with a less severe autosomal dominant form.<sup>20,21</sup> It is characterized by moderate muscle weakness with late onset<sup>20</sup>; however, several neonatal cases have been reported with very severe phenotype. *DNM2* encodes for dynamin 2, a mechanoenzyme implicated in endocytosis,<sup>22</sup> exocytosis,<sup>23,24</sup> as well as cytoskeleton organization.<sup>25–27</sup> Different *in vitro* studies have proposed CNM-causing *DNM2* mutations increase dynamin 2 guanosine triphosphatase (GTPase) activity and oligomer stability, suggesting a gain of function of the mutated forms.<sup>28,29</sup> This hypothesis is sustained by the fact that overexpression of wild-type *DNM2* in mice recapitulates a CNM-like phenotype.<sup>30,31</sup> To date, no effective and specific therapy is available for patients with CNM.

The *Mtm1* knockout (*Mtm1KO*) mice present a severe muscular phenotype and have been extensively used to understand the pathophysiology of XLCNM and to test therapeutic approaches.<sup>32–37</sup> They develop a severe progressive myopathy starting from week 3 that is clinically reflected by a severe muscle atrophy and weakness.<sup>32</sup> They present a short lifespan and die between 1 and 3 months of age. Transversal muscle sections of *Mtm1KO* exhibit a typical XLCNM histology with predominance of hypotrophic and rounded fibers with centralized nuclei, abnormal organelle distribution, and aggregated proteins, including caveolin 3 (Cav3) and desmin.<sup>13,36</sup> In addition, and similarly to muscle biopsies from XLCNM patients, *DNM2* was found to be upregulated at the symptomatic phase, pointing to *DNM2* reduction as a therapeutic strategy.<sup>36</sup>

We have previously reported that reduction of *DNM2* expression by genetic crossing rescues the early XLCNM lethality and ameliorates

Received 17 August 2017; accepted 9 February 2018;  
<https://doi.org/10.1016/j.ymthe.2018.02.008>.

<sup>7</sup>These authors contributed equally to this work.

**Correspondence:** Belinda S. Cowling, Institut de Génétique et de Biologie Moléculaire et Cellulaire (IGBMC), Illkirch 67400, France.

**E-mail:** [belinda@igbmc.fr](mailto:belinda@igbmc.fr)

**Correspondence:** Jocelyn Laporte, Institut de Génétique et de Biologie Moléculaire et Cellulaire (IGBMC), Illkirch 67400, France.

**E-mail:** [jocelyn@igbmc.fr](mailto:jocelyn@igbmc.fr)

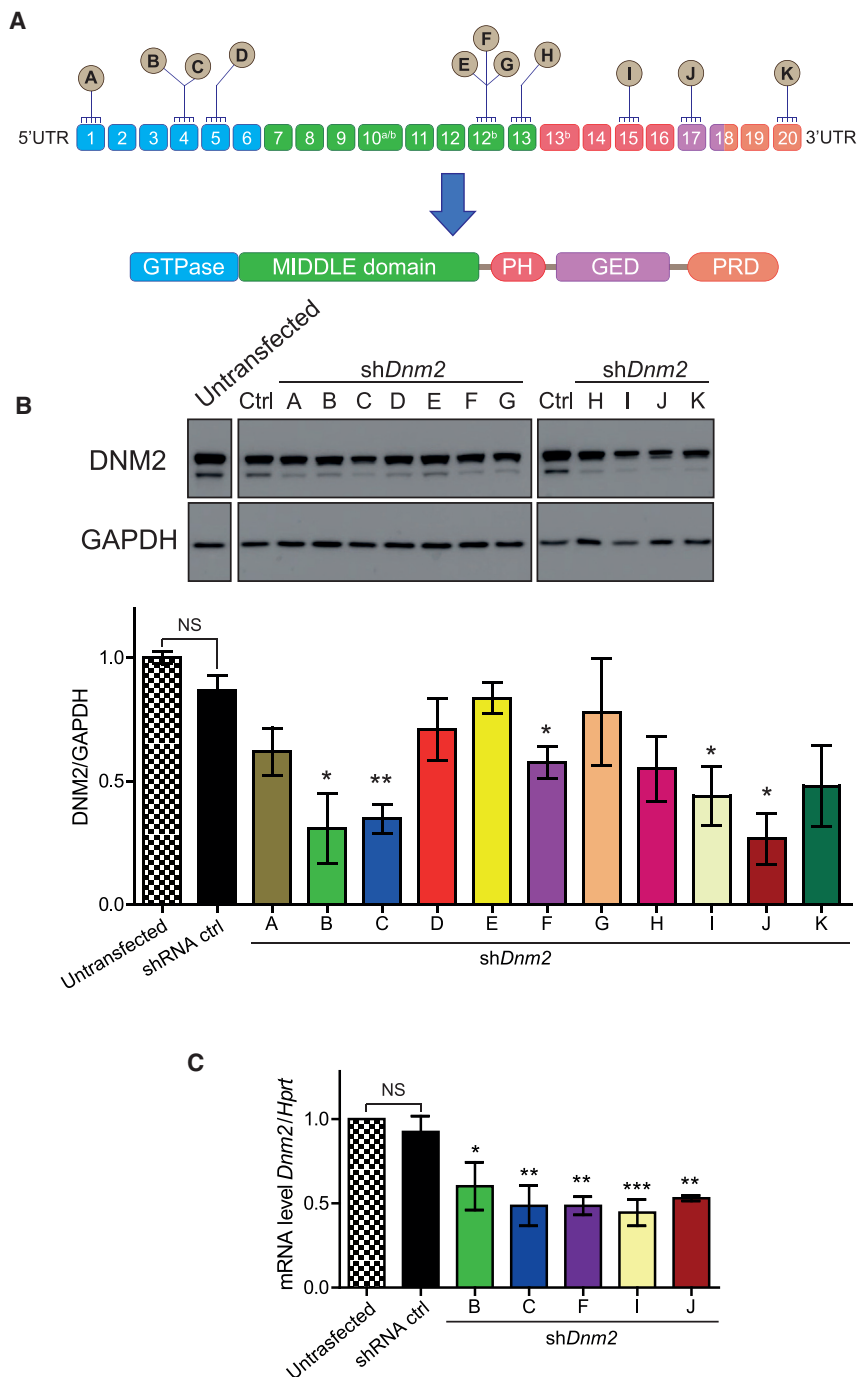

**Figure 1. In Vitro Validation of shRNA Targeting *DNM2***

(A) Location of shRNA-targeting sequences in *Dnm2* mRNA. Exons are depicted as boxes, and exons 10a, 10b, 12b, and 13b are alternative exons. Below, the protein domains encompass a GTPase domain, a middle and GTP effector (GED) domains forming the stalk, a pleckstrin homology (PH), and a proline-rich (PRD) domain. (B) Representative western blot from HEK293T cells co-transfected with two plasmids is shown: one encoding human *DNM2* and the second expressing the different shRNA. *DNM2* protein levels were determined by densitometry and standardized to GAPDH. (C) Endogenous *Dnm2* mRNA levels in shRNA-treated C2C12 mouse myoblast cells were determined by qRT-PCR and standardized to *Hprt*. Cells were electroporated with shRNA ctrl or sh*Dnm2* (B, C, F, I, or J).  $n = 3$  biological replicates per each group. Data represent an average of three independent experiments  $\pm$  SEM. \* $p < 0.05$ ; \*\* $p < 0.01$  for sh*Dnm2*-treated versus shRNA ctrl-treated cells (ANOVA test).

and an efficient biodistribution in patients to reach all muscles of the body.

Here, we tested another approach of reducing *DNM2* expression based on AAV-short hairpin RNA (shRNA). Adeno-associated virus (AAV) vectors have been intensively used to re-express the defective gene in many monogenic disorders.<sup>38</sup> In addition, an increasing number of studies showed their efficacy to repress gene expression when they encode for shRNA complementary to the target mRNA.<sup>39–42</sup> In the present study, we evaluated the potential of AAV-shRNA to knockdown *DNM2* in mice. A single intramuscular injection of AAV-sh*Dnm2* resulted in long-term reduction of *DNM2* protein level and restored different CNM features. Our data validate the epistasis between *Mtm1* and *Dnm2* and propose an alternative approach to target *DNM2* for therapeutic approaches.

## RESULTS

### Design and In Vitro Validation of shRNA Targeting *DNM2* Conserved Regions

To target *DNM2* mRNA for degradation, eleven highly conserved regions between the human and mouse *DNM2* mRNA were selected to design

the different shRNA sequences (Figure 1A; Table 1). All shRNA-*Dnm2* sequences as well as a scrambled sequence (shRNA ctrl) had an identical nine-nucleotide hairpin or loop sequence.

To evaluate the efficacy of shRNA to knockdown *DNM2* protein level *in vitro*, HEK293T cells were co-transfected with a plasmid expressing human *DNM2* and plasmids expressing the sh*Dnm2* under the control of the mouse U6 promoter. *DNM2* protein level

most CNM features, notably increased muscle force and correction of myofiber histology, indicating an epistasis between *MTM1* and *DNM2*.<sup>36</sup> These data have been recently confirmed using antisense oligonucleotides (ASOs) that target the nuclear pre-mRNA of *Dnm2*. Repeated injections of ASO targeting *Dnm2* into *Mtm1*KO mice efficiently reduced the *DNM2* protein level and revert the CNM features.<sup>35</sup> However, such ASO strategy would require repeated injections in patients, potentially on a long-term basis,

Table 1. Selected shRNA and Target Sequences

| shRNA      | Target Sequence (Mouse)                 | Remarks                                       | Top 3 of Potential Off-Target mRNA (Mouse)                                   | Sequence Homology (%) |
|------------|-----------------------------------------|-----------------------------------------------|------------------------------------------------------------------------------|-----------------------|
| shRNA ctrl | GGGCTATCCCAACGCTATTAGT                  | no target                                     | UTP23 small subunit processome component ( <i>Utp23</i> )                    | 68                    |
|            |                                         |                                               | Von Willebrand factor A domain containing 2 ( <i>Vwa2</i> )                  | 63                    |
|            |                                         |                                               | B cell CLL/lymphoma 11A (zinc finger protein) ( <i>Bcl11a</i> )              | 59                    |
| shDnm2 A   | AACCGCGGGATGGAAGAGCT                    | identical to human sequence                   | transmembrane protein 67 ( <i>Tmem67</i> )                                   | 70                    |
|            |                                         |                                               | family with sequence similarity 206, member A ( <i>Fam206a</i> )             | 70                    |
|            |                                         |                                               | protein phosphatase 1F (PP2C domain containing) ( <i>Ppm1f</i> )             | 70                    |
| shDnm2 B   | AACTTGACCTCATCGACCTC                    | identical to human sequence                   | potassium voltage-gated channel, subfamily G, member 1 ( <i>Kcng1</i> )      | 76                    |
|            |                                         |                                               | IKAROS family zinc finger 1 ( <i>Ikfz1</i> )                                 | 76                    |
|            |                                         |                                               | DnaJ heat shock protein family (Hsp40) member C2 ( <i>Dnajc2</i> )           | 71                    |
| shDnm2 C   | AAGGACATGATCCTGCAGTTCAT                 | identical to human sequence                   | adaptor-related protein complex 3, delta 1 subunit ( <i>Ap3d1</i> )          | 78                    |
|            |                                         |                                               | suppressor of glucose, autophagy-associated 1 ( <i>Soga1</i> )               | 65                    |
|            |                                         |                                               | adhesion G protein-coupled receptor G2 ( <i>Adgrg2</i> )                     | 60                    |
| shDnm2 D   | TCGGTGTTCATACCAAGCT                     | identical to human sequence                   | myosin IA ( <i>Myo1a</i> )                                                   | 78                    |
|            |                                         |                                               | ankyrin repeat domain 52 ( <i>Ankrd52</i> )                                  | 73                    |
|            |                                         |                                               | zinc finger protein 407 ( <i>Zfp407</i> )                                    | 73                    |
| shDnm2 E   | TGCCAACTGTT <u>T</u> CTATACT            | 1 nucleotide different to human (underlined)  | protocadherin 17 ( <i>Pcdh17</i> )                                           | 73                    |
|            |                                         |                                               | folliculin interacting protein 1 ( <i>Fnip1</i> )                            | 73                    |
|            |                                         |                                               | zeta-chain (TCR)-associated protein kinase ( <i>Zap70</i> )                  | 73                    |
| shDnm2 F   | AACTGTT <u>T</u> CTATACTGAG <u>G</u> AG | 2 nucleotides different to human (underlined) | protocadherin 17 ( <i>Pcdh17</i> )                                           | 71                    |
|            |                                         |                                               | tenascin R ( <i>Tnr</i> )                                                    | 71                    |
|            |                                         |                                               | ligand-dependent nuclear receptor corepressor-like ( <i>Lcor1</i> )          | 66                    |
| shDnm2 G   | TT <u>T</u> CTATACTGAG <u>G</u> AGCTGGT | 2 nucleotides different to human (underlined) | WNK lysine-deficient protein kinase 2 ( <i>Wnk2</i> )                        | 71                    |
|            |                                         |                                               | TRAF3 interacting protein 2 ( <i>Traf3ip2</i> )                              | 66                    |
|            |                                         |                                               | trans-2,3-enoyl-CoA reductase-like ( <i>Tecrl</i> )                          | 66                    |
|            |                                         |                                               | HGF-regulated tyrosine kinase substrate ( <i>Hgs</i> )                       | 78                    |
| shDnm2 H   | GCACGCAGCTGAACAAGAA                     | identical to human sequence                   | two-pore segment channel 2 ( <i>Tpcn2</i> )                                  | 73                    |
|            |                                         |                                               | interleukin-1 alpha ( <i>Il1a</i> )                                          | 73                    |
| shDnm2 I   | AAGAAGTACATGCTGCC <u>A</u> CTGGA        | 1 nucleotide different to human (underlined)  | zinc finger, C3H1-type containing ( <i>Zfc3h1</i> )                          | 69                    |
|            |                                         |                                               | DENN/MADD domain containing 5A ( <i>Denna5a</i> )                            | 69                    |
|            |                                         |                                               | small G protein signaling modulator 1 ( <i>Sgsm1</i> )                       | 65                    |
| shDnm2 J   | AACACCTTCTCCATGGACCC                    | identical to human sequence                   | proteasome (prosome, macropain) 26S subunit, non-ATPase, 12 ( <i>Psm12</i> ) | 75                    |
|            |                                         |                                               | GTP cyclohydrolase 1 ( <i>Gch1</i> )                                         | 75                    |
|            |                                         |                                               | acyl-CoA synthetase medium-chain family member 3 ( <i>Acs3</i> )             | 70                    |
| shDnm2 K   | CCATTATCCGCCCGCCGAGC                    | identical to human sequence                   | poly (ADP-ribose) polymerase family, member 6 ( <i>Parp6</i> )               | 66                    |
|            |                                         |                                               | RAP2B, member of RAS oncogene family ( <i>Rap2b</i> )                        | 66                    |
|            |                                         |                                               | arylsulfatase i ( <i>Arsi</i> )                                              | 66                    |

CoA, coenzyme A.

was measured 72 hr post-transfection. A statistically significant decrease of DNM2 protein level was observed with five shDnm2 constructs (B, C, F, I, and J) out of the 11 shDnm2s tested (Figure 1B). In addition, selected shDnm2s elicited a strong decrease of the endogenous murine *Dnm2* mRNA when electroporated

into mouse C2C12 myoblasts (Figure 1C). However, protein level was unchanged 48 hr after electroporation, most likely due to longer stability of endogenous DNM2 (Figure S1). These results indicate that five shRNAs (B, C, F, I, and J) target efficiently both human and murine *DNM2* mRNA.

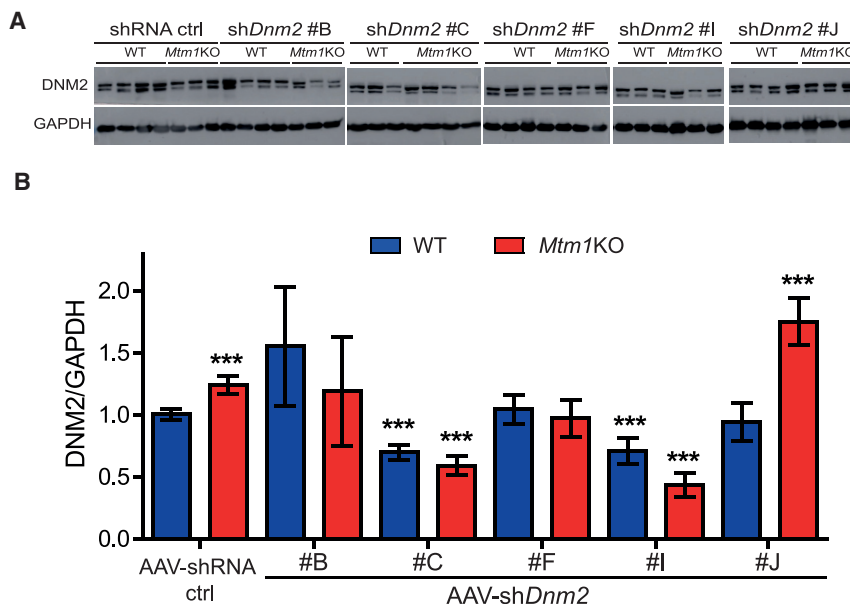

**Figure 2. In Vivo Validation of shRNA Targeting *Dnm2* following Intramuscular Injection**

(A) Representative western blot of 7-week-old WT or *Mtm1KO* TAs injected with either AAV-shRNA ctrl or AAV-shDnm2 (B, C, F, I, or J). (B) DNM2 densitometries were quantified and standardized to the loading control GAPDH ( $n = 5-7$  mice/group). \*\*\* $p < 0.01$  versus WT muscles treated with AAV-shRNA ctrl (ANOVA test).

#### Efficient *In Vivo* *Dnm2* Knockdown following a Single Intramuscular Injection of AAV shRNA

To test the *in vivo* efficacy of the five best shDnm2s, AAV serotype 2/9 vectors encoding the selected shDnm2 or shRNA ctrl were produced. AAV2/9 serotype efficiently transduces skeletal muscle.<sup>43</sup> The AAV-shDnm2s (B, C, F, H, or I) were administrated locally into right tibialis anterior muscles (TAs) of 3-week-old wild-type (WT) or *Mtm1KO* mice at a dose of  $1.2 \times 10^{11}$  viral genome per TA while the same dose of AAV-shRNA ctrl was injected into the contralateral TA. Four weeks later, GFP expression was visualized in the injected TAs to ensure an effective viral transduction (Figure S2). TAs were weighed, and *in situ* muscular force as well as DNM2 protein level were measured. DNM2 protein levels in TA injected with AAV-shDnm2 B, F, and J were not reduced below TA injected with AAV-shRNA ctrl (Figures 2A and 2B). Accordingly, these muscles remain atrophic (Figures 3A, 3B, and S3). Conversely, muscles of WT or *Mtm1KO* injected with shDnm2 C or I presented a strong decrease of DNM2 protein level (Figures 2A and 2B). In addition, improvement of muscle mass and force were noted for *Mtm1KO* injected with shDnm2 C or I. *Mtm1KO* muscles injected with AAV-shDnm2 C or I were remarkably bigger and exhibit an increase of specific muscle force compared to the contralateral TA injected with shRNA ctrl (Figures 3A–3C and S3). Nevertheless, we noted that the absolute force of WT muscles injected with AAV was reduced when compared to those injected with NaCl, whereas muscle mass and histology were similar (Figure S4). This may indicate a deleterious effect of AAV injection and GFP expression specifically on muscle force.<sup>44,45</sup> Moreover, these results validate *in vivo* the efficiency of several shRNA sequences targeting *Dnm2* mRNA and show that reducing DNM2 after a single injection of AAV-shDnm2 efficiently ameliorates muscle mass and force of the *Mtm1KO* XLCNM model.

#### AAV shRNA-Mediated Knockdown of *Dnm2* Rescues *Mtm1KO* Muscle Histology

To assess whether the functional amelioration of *Mtm1KO* muscles is linked to an improved muscle histology, transversal sections of TA 4 weeks post-injection were stained with H&E. *Mtm1KO* muscles treated with AAV-shRNA ctrl exhibited small and rounded fibers with a 3-fold reduction in fiber size compared to WT muscles (Figures 4A–4C). In addition, approximately 20% of the myofibers presented with abnormal internal

localization of nuclei (Figure 4D). Succinate dehydrogenase (SDH) staining showed abnormal mitochondrial distribution with aggregated staining in the center or forming a halo at the periphery of the myofiber (Figures 4A and 4E). These abnormal histological features are reminiscent of the typical histology seen in XLCNM patients<sup>46</sup> and were corrected in *Mtm1KO* TA when treated with two different AAV-shDnm2. Muscles injected with AAV-shDnm2 C or I showed a normalization of the myofiber size with nuclei positioned at the periphery (Figures 4A–4D). In addition, TAs injected with AAV-shDnm2 C exhibit a normal muscle histology similar to WT with normal mitochondrial distribution and a decreased number of fibers with central or peripheral accumulation of mitochondria (Figures 4A and 4E). Injection of shDnm2 I correlated with an increase of myofiber size and a strong improvement of mitochondria distribution; however, few myofibers still presented an intermediate size with mitochondrial oxidative staining in the center or forming a halo at the periphery (Figures 4A–4E). These results suggest only a slight difference in efficacy between shDnm2 C and I based on SDH staining and show overall a strong rescue of muscle histology following a single injection of two different AAV-shDnm2s.

#### *Dnm2* Reduction through AAV-shRNA Rescues Myofiber Organization in *Mtm1KO* Muscles

MTM1 deficiency was documented to induce disorganization of muscle fiber in several species.<sup>12,32,47</sup> MTM1-deficient fibers present with misalignment of Z-line; mislocalization of organelles, including nuclei and mitochondria; and a strong defect in triad structure (formed by one T-tubule and two sarcoplasmic reticulum cisternae) implicated in excitation-contraction coupling. In agreement with the literature, misalignment of the Z-line was observed in the *Mtm1KO* TAs by transmission electronic microscopy (TEM) in this study (Figure 5A) and confirmed by immunolabeling of alpha-actinin (Z-line marker; Figure 6). Well-organized triads are seldom observed in this model

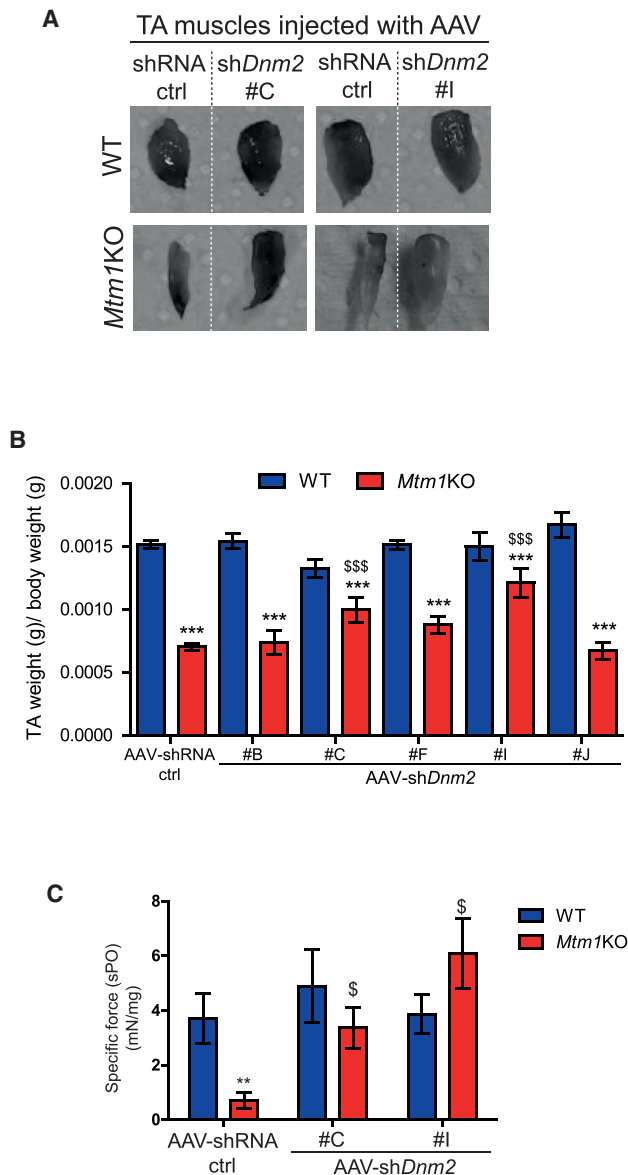

**Figure 3. Positive Physiological Effects of AAV shRNA-Mediated *Dnm2* Knockdown**

(A) Photography of TAs from WT or *Mtm1KO* mice treated with AAV-shRNA ctrl or shDnm2 (C or I). (B) TA weight relative to body weight is shown ( $n = 6$ ). (C) Specific muscle force of TA was measured after sciatic nerve stimulation. The specific muscle force was calculated by dividing the absolute force by TA weight ( $n = 5-7$  mice/group). \*\* $p < 0.01$ ; \*\*\* $p < 0.001$  versus WT TA treated with shRNA ctrl. \$ $p < 0.05$ ; \$\$\$ $p < 0.01$  *Mtm1KO* treated with AAV-shDnm2 versus *Mtm1KO* treated with AAV-shRNA ctrl (ANOVA test).

(Figures 5A and 5B), and this finding parallels the perturbed localization of the junctional sarcoplasmic reticulum calcium channel RYR1 and caveolin 3 implicated in T-tubule biogenesis (Figure 6).

AAV-shDnm2 injection into *Mtm1KO* mice restored the disorganized ultrastructure observed in untreated mice. Using TEM,

myofiber ultrastructure revealed a well-organized structure with increased ratio of normal and well-positioned triads in treated *Mtm1KO* mice (Figures 5A and 5B), equivalent to the rescue observed targeting *Dnm2* systemically by ASO at higher doses.<sup>35</sup> RYR1 and caveolin 3 were also correctly localized as in WT muscle (Figure 6). Furthermore, Z-line alignment and alpha-actinin labeling were also normal. DNM2 localized normally in both untreated and treated *Mtm1KO* muscles, in a transverse localization. In addition, the desmin aggregation observed in the *Mtm1KO* mice treated with AAV-shRNA ctrl was also rescued upon injection with AAV-shDnm2 (Figure 6).

Altogether, these findings underline a complete amelioration of the XLCNM-like phenotypes in the *Mtm1KO* model at the structural and molecular levels upon DNM2 reduction through AAV-shRNA treatment and fully correlate with the rescue in muscle mass and force.

## DISCUSSION

Myotubular myopathy is the most severe form of CNM with highest incidence, and no available effective treatment exists. Among the different therapeutic approaches that were tested in preclinical trials on animal models, few showed significant histological and functional improvements. Here, we provide evidence showing that a single injection of AAV-shDnm2 rescues the CNM phenotype of *Mtm1KO* mice at the functional, histological, and ultrastructural level when analyzed four weeks after injection. Molecular defects were greatly ameliorated with a strong improvement of the localization of desmin, caveolin 3, and RYR1. The structural alterations of the myofibers were rescued, including normalization of mitochondria and nuclei positioning and triad shape and distribution. Furthermore, the different histological hallmarks of CNM were absent upon AAV-shDnm2 injection, with an increase in myofiber size and decrease in frequency of fibers with mislocalized nuclei. These effects correlated with a normalization of muscle mass and force. Nonetheless, muscles injected with AAV showed a reduction in general absolute muscle force. This could be due to GFP overexpression, as previous studies showed that GFP expression impairs contractile activity of the muscle by affecting actin-myosin interaction.<sup>44,45</sup>

Our results demonstrate that reduction of DNM2 level, through local injection of AAV-shDnm2, prevents the disease progression. These data confirmed the therapeutic potential of DNM2 knockdown and are concordant with those obtained with ASO targeting *Dnm2* or genetic reduction of *Dnm2*.<sup>35,36</sup> Furthermore, it is noteworthy that, using this approach, we almost fully rescued the CNM phenotype targeting DNM2 in one muscle alone, despite the severe phenotype still observed in other muscles of the mouse. DNM2 protein levels are increased in muscles from both XLCNM patients and *Mtm1KO* mice at symptomatic ages. The fact that reducing DNM2 level promotes disease prevention strongly supports the observed increase in DNM2 as a significant cause of the disease initiation and/or progression. This finding is sustained by the fact that overexpression of DNM2 in WT mice by transgenesis or AAV injections creates a CNM phenotype.<sup>30,31</sup> Moreover, *in vitro* experiments showed that

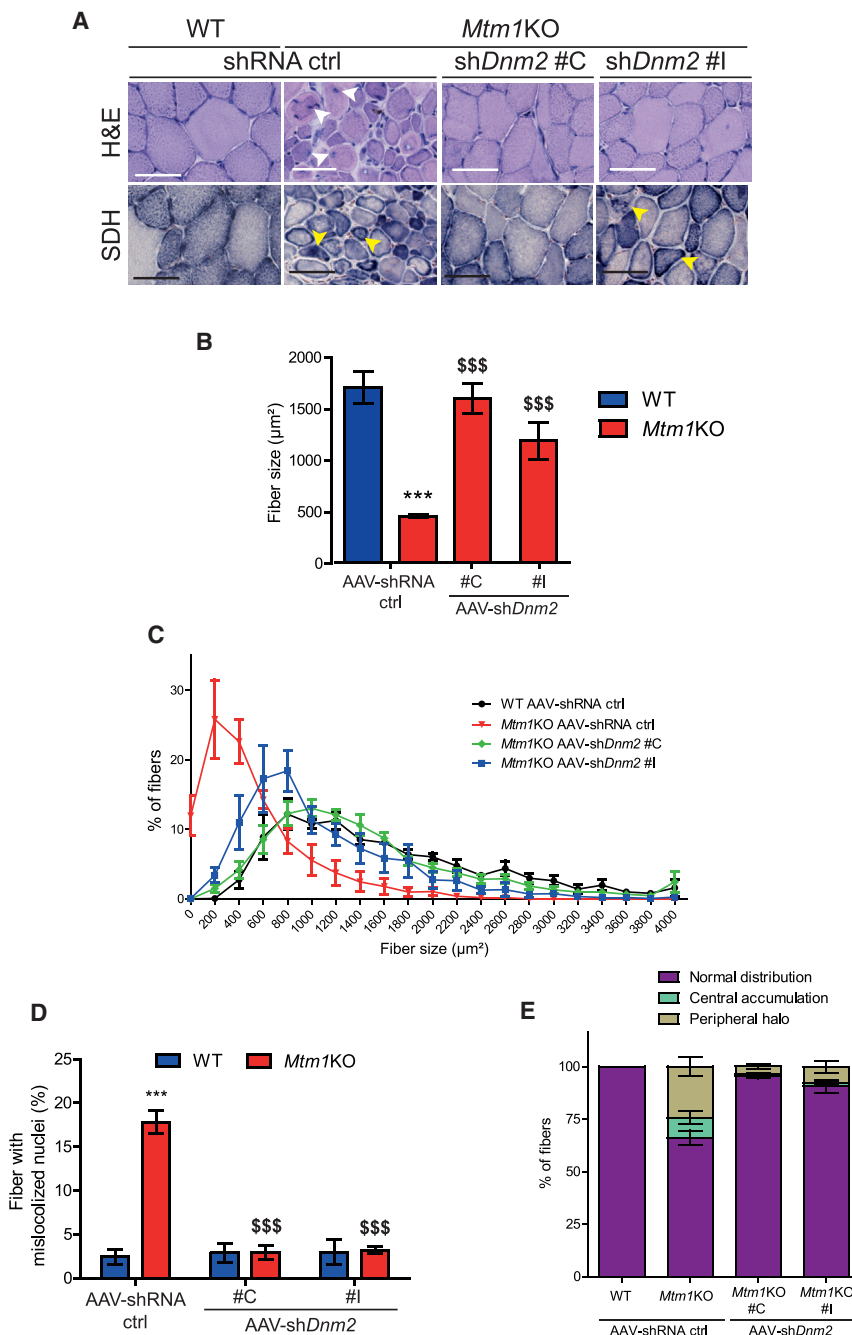

**Figure 4. Histology Amelioration of TA Treated with AAV shDnm2**

(A) TA sections of WT or *Mtm1*KO mice treated with AAV-shRNA ctrl or shDnm2 (C or I) were stained with H&E and SDH to visualize fiber size, shape, nuclei positioning, and mitochondrial oxidative activity. Arrows show mislocalized nuclei or aggregated mitochondria (scale bars: 50  $\mu\text{m}$ ). (B) TA myofiber area was calculated on 300–400 fibers per sample ( $n = 5$  mice/group). (C) Fiber size distribution of WT or *Mtm1*KO TAs according to size groups. Affected *Mtm1*KO TAs have more small fibers and less medium-size or large fibers. (D) Percentage of fibers with mislocalized nuclei was determined in 1,000 fibers ( $n = 5$ –6 mice/group). (E) Percentage of fibers with abnormal mitochondrial distribution was determined in 1,000 fibers ( $n = 5$  mice/group). \*\*\* $p < 0.001$  versus WT TA treated with shRNA ctrl. \$\$\$ $p < 0.01$  *Mtm1*KO treated with AAV-shDnm2 versus *Mtm1*KO treated with AAV-shRNA ctrl (ANOVA test).

DNM2 and the molecular mechanism underlying this rescue remain unclear. However, MTM1 deficiency was reported to cause an alteration of autophagy and protein accumulation.<sup>18,19</sup> One could hypothesize that autophagy defects lead to imbalance between transcription and clearance of DNM2, causing its accumulation and increased overall activity. Alternatively, MTM1 might somehow regulate DNM2 transcription or translation. However, this is less likely, as *Dnm2* mRNA is not elevated in *Mtm1*KO mice.<sup>36</sup> In addition, one cannot exclude that MTM1 directly regulates DNM2 activity or transport in addition to its expression.

Here, we validated several shRNA sequences targeting *Dnm2* mRNA *in vitro* and *in vivo* for efficient DNM2 knockdown. In particular, we identified shRNA sequences partially (I) or fully (C) improving the molecular, cellular, and physiological phenotypes. These data provide the proof of concept that targeting *Dnm2* mRNA for degradation using AAV as a delivery method is efficient to ameliorate XLCNM, thus validating a novel approach to tackle this disease.

Compared to the recently reported ASO targeting nuclear *Dnm2* pre-mRNA, shRNA targets the cytoplasmic mRNA, and both approaches efficiently decrease DNM2 level. Moreover, AAVs have two main advantages: they can have a good muscle tropism and they can sustain long-term expression following a single injection. Indeed, tissue specificity can be further achieved by modulating the AAV serotype and the promoter controlling the expression of the transgene. Numerous AAV serotypes have been identified, and several showed a strong skeletal muscle tropism.<sup>48</sup> In addition, several promoter and regulatory cassettes have been reported to have a high

DNM2 mutations leading to a dominant CNM form increase its GTPase activity and oligomerization stability.<sup>28,29</sup> We thus hypothesize that either increase in DNM2 protein level upon impairment of MTM1 or increase in DNM2 activity following mutations trigger the CNM phenotypes in XLCNM or ADCNM, respectively.

The present results confirm the epistasis between *Mtm1* and *Dnm2* and place DNM2 downstream of MTM1 in the pathological pathway causing CNM. To date, the functional link between MTM1 and

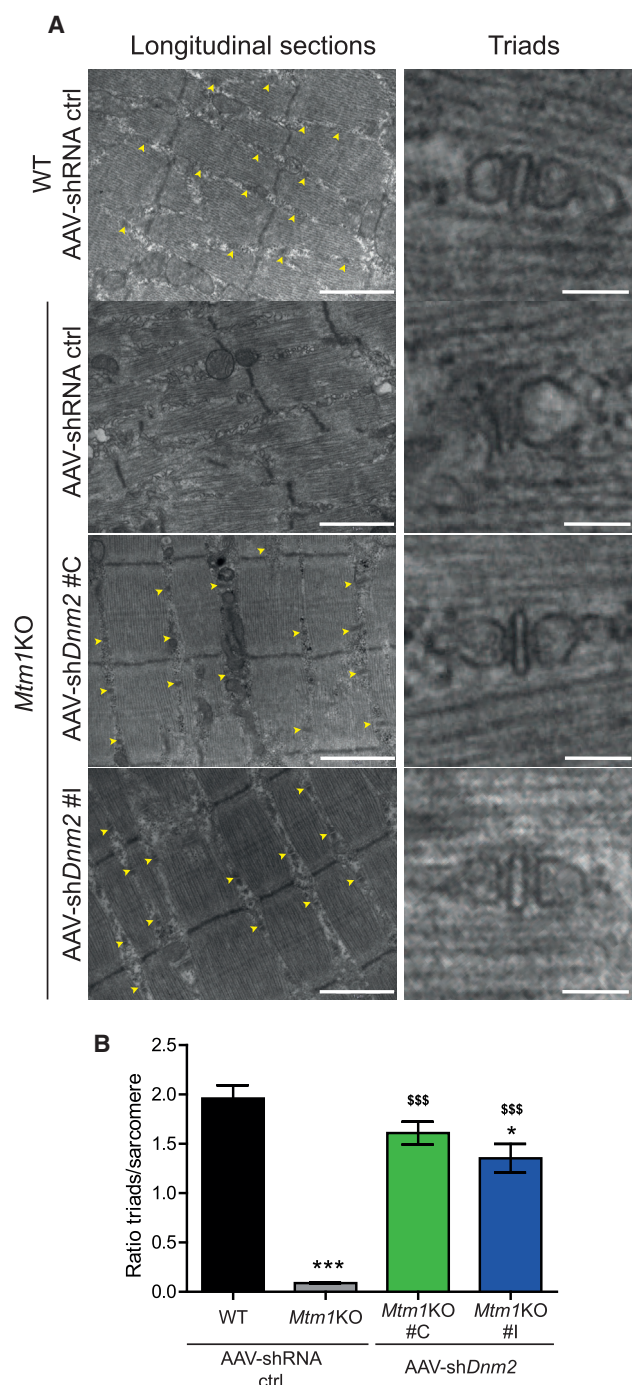

**Figure 5. Amelioration of Muscle Ultrastructure through AAV-shDnm2 Injections**

(A) Electron microscopy was used to assess the general ultrastructure of myofibers and to count the triads formed (yellow arrows, scale bar: 1  $\mu$ m for left panels and 100 nm for right panels). (B) Graph representing the number of triad well formed and localized per sarcomere is shown (n = 3 per group). \*p < 0.05; \*\*\*p < 0.001 for *Mtm1KO* treated with AAV-shRNA ctrl or AAV-shDnm2 versus WT treated with AAV-shRNA ctrl. \$\$\$p < 0.001 *Mtm1KO* treated with AAV-shDnm2 versus *Mtm1KO* treated with AAV-shRNA ctrl (ANOVA test).

activity in skeletal muscle.<sup>49</sup> Together, the combination of these two elements would largely restrict the delivery of shRNA to skeletal muscles, which may improve the efficacy while decreasing the required dose and minimizing potential side effects related to reduction of DNM2 in other organs. Of note, reduction of DNM2 by 50% through transgenesis or ASO injection did not induce a detectable toxicity.<sup>35,36</sup>

Many studies showed the potential of AAV to maintain a long-term and robust transgene expression,<sup>50–53</sup> which implies avoiding multiple injections that may trigger immune reaction against these vectors. Moreover, several reports claim the safety of recombinant AAV vector. Unlike other viral vectors, they do not integrate the genome of the host cell, and they elicit a mild and manageable immune response.<sup>52–54</sup> However, they represent some limitations. Following their transduction into host cells, AAVs are mostly present as non-integrated episomes. Loss of the transgene expression could be expected due to normal muscle turnover. In addition, it has been reported that AAVs do not transduce satellite cells, which are multipotent cells able to differentiate and give rise to myofibers.<sup>55</sup> Thus, re-administration of these vectors after the initial infusion might be needed. Furthermore, human administration of AAV requires a large amount and high-titer production, which represent a manufacturing challenge and costly process. Also, expression of shRNA to downregulate DNM2 level using ubiquitous RNA polymerase III promoters (like U6 or H1) might have some side effects in non-muscle tissues. These promoters do not provide a spatial or temporal control, and they show a high transcription activity in some cell types causing microRNA processing factors (Exportin-5 and RNA-induced silencing complex [RISC]) saturation, which leads to cytotoxicity and tissue damage.<sup>56–58</sup> Transcription of shRNA from polymerase II promoters could be an alternative for effective and safer RNAi therapeutics.<sup>59</sup>

In conclusion, this study shows once again the usefulness of *Mtm1KO* as a bio-assay for screening of therapeutic agents and provides the first proof of principle that using AAV encoding for shDnm2 in this XLNM mouse model shows a strong and robust reduction of DNM2 protein level following a single injection. These shRNA-targeting *Dnm2s* exhibit a strong affinity to human *DNM2* transcript as shown *in vitro* (Figure 1), which might be relevant for human application in future clinical trials.

## MATERIALS AND METHODS

### Cell Transfection

HEK293Ts were co-transfected by plasmid encoding human DNM2 and another plasmid expressing either shRNA ctrl or different shDnm2 using Lipofectamine 2000 and following the manufacturer's instructions. Cells were seeded in 6-well plates. At 80% of confluency, a mixture of Lipofectamine reagent and opti-minimum essential medium (MEM) medium containing 2  $\mu$ g of plasmid expressing human DNM2 and 2  $\mu$ g of plasmid encoding the different shRNA was incubated for 4 hr. Then, the mixture was removed and replaced by DMEM containing 20% fetal calf serum (FCS). The transfected cells were incubated at 37°C for 72 hr before harvesting for protein analysis.

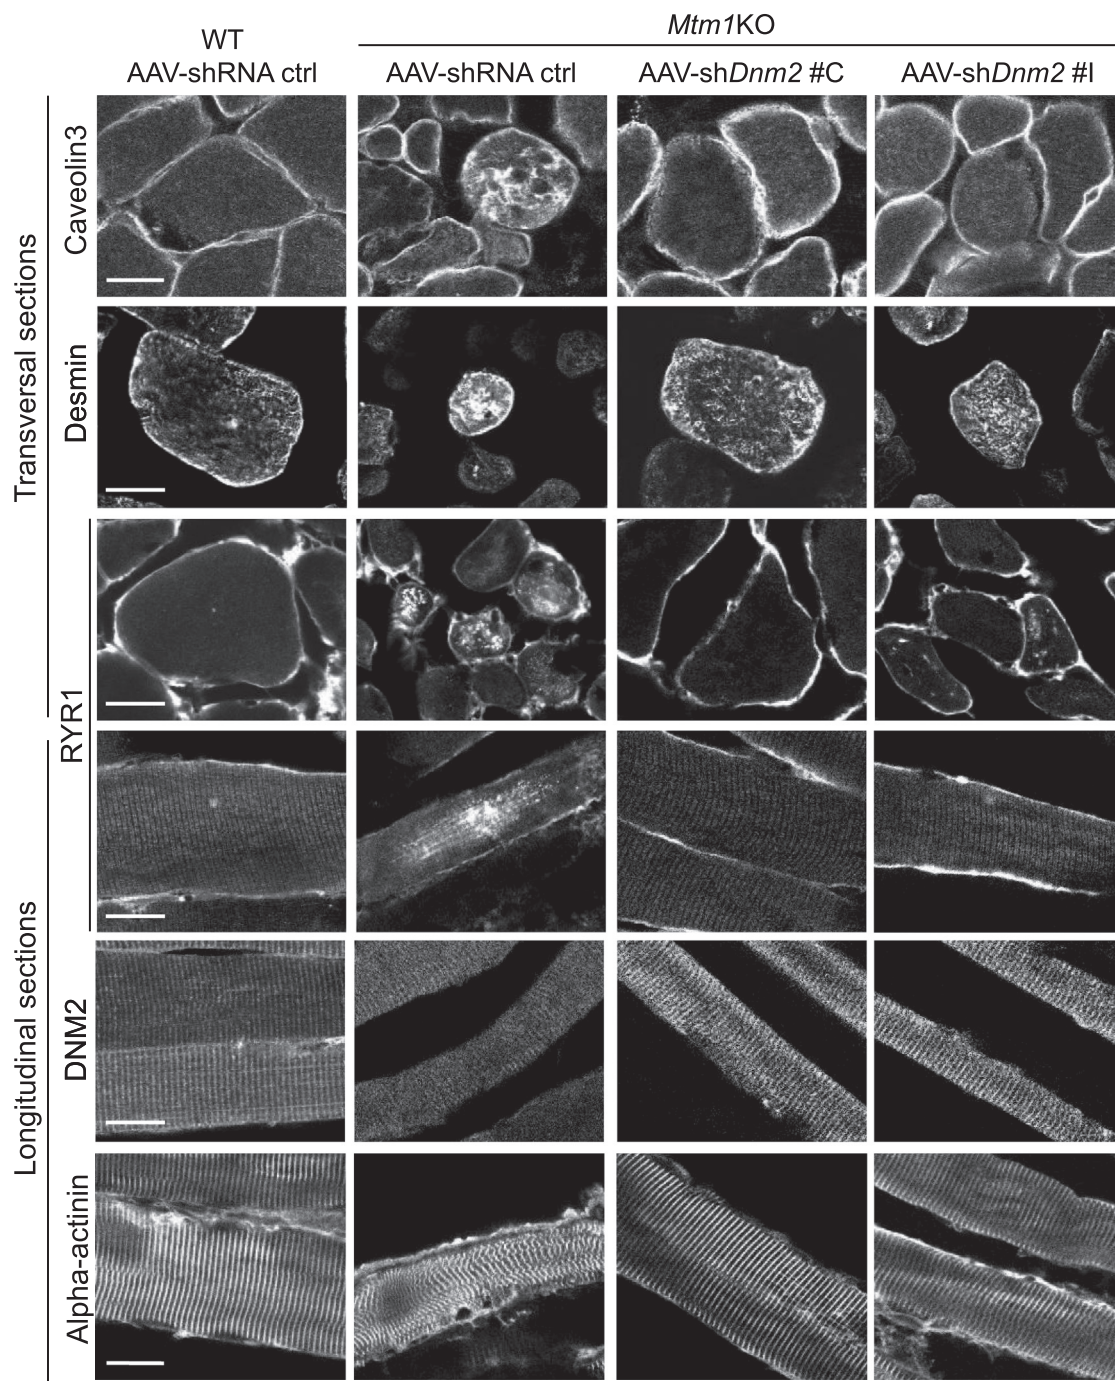

**Figure 6. Improvement of Molecular Defects in *Mtm1*KO Mice Treated with AAV sh*Dnm2***

Immunolabeling of CAV3, desmin, RYR1, DNM2, and alpha-actinin was performed on 8  $\mu$ m transversal or longitudinal sections. The staining was visualized using confocal microscopy (scale bar: 20  $\mu$ m).

C2C12 mouse myoblast were electroporated with plasmids encoding the different shRNA candidates using Amaxa nucleofector2B Kit V and following the manufacturer's instructions. Briefly, cells were trypsinized and  $1 \times 10^6$  cells per sample were gently centrifuged at

90 g for 10 min at room temperature. Cell pellet was resuspended in 100  $\mu$ L of the solution provided in the kit. Then, 2  $\mu$ g of plasmid expressing shRNA ctrl or different sh*Dnm2*s were added to the cell suspension and transferred immediately to an electroporation

cuvette. Electroporation was performed using the B-032 program of Nucleofector I Device. The electroporated cells were incubated for 48 hr in DMEM medium containing 20% FCS at 37°C before harvesting the electroporated cells for protein and RNA analysis.

### Animals

Animal experiments were conducted on male *Mtm1KO* or WT 129SvPAS mice according to the French and European legislation on animal care and experimentation. Protocol nos. Com'Eth IGBMC-ICS 2012-132, 2013-034, and 2016-5453 were approved by the Institutional Ethics Committee. Mice were housed in a temperature-controlled room and ventilated cages with 12 hr day light/darkness cycle and given free access to food.

### Intramuscular Injection of AAV

3-week-old male *Mtm1KO* or WT was weighed and then an anesthetic solution of ketamine 20 mg/mL and xylazine 0.4% at 5  $\mu$ L/g of body weight was administered by intraperitoneal injection. Right TAs were injected with  $1.2 \times 10^{11}$  vg/TA in 20  $\mu$ L of AAV2/9 expressing *shDnm2* (either B, C, F, I, or J), and the same dose of AAV2/9 expressing *shRNA ctrl* was injected in the contralateral TA. As an additional control, 20  $\mu$ L of NaCl 0.9% was administered into WT TA. At 7 weeks of age, mice were humanely killed by CO<sub>2</sub> suffocation followed by cervical dislocation. The TAs were dissected and weighed. They were snap frozen in liquid nitrogen-cooled isopentane and stored at –80°C for H&E and SDH histology analysis as well as protein extraction and quantification. For immunostaining, TAs were stored in paraformaldehyde (PFA) 4% for 24 hr, and then they were transferred to sucrose 30% overnight and stored at 4°C.

### Immunostaining of Muscle Sections

8  $\mu$ m transversal or longitudinal cryosections of TA were stained with antibodies against CAV3 (Santa Cruz Biotechnology N-18 sc-7665; 1:500), RYR1 (34C abcam2668; 1:500), desmin (Santa Cruz sc-7559; 1:500), DNM2 (homemade antibody R2680; 1:500), and alpha-actinin (anti- $\alpha$ -actinin sarcomeric clone EA-53; 1:500). Images were taken with a Leica SP8-UV confocal microscope.

### Muscle Histology

8  $\mu$ m transversal cryosections were prepared and stained by H&E or SDH. Entire muscle sections were imaged with the Hamamatsu NanoZoomer 2HT slide-scanner. The percentage of TA fibers with mislocalized (centralized or internalized) nuclei or abnormal mitochondrial distribution was counted using the cell counter plugin in Fiji image analysis software. The fiber area was measured using the Fiji software.

### TA Contractile Properties

TA contraction properties were evaluated *in situ* after sciatic nerve stimulation using Complete1300A Mouse Test System from Aurora. Briefly, mice were anesthetized with intraperitoneal (i.p.) injection of pentobarbital (60 mg/kg) and maintained under deep anesthesia during the experiment. The distal tendon of TA was detached and tied to the isometric transducer using a silk ligature. The knee and

foot were fixed with clamps. All isometric contraction measurements were made at an initial muscle length of L<sub>0</sub> (length at which maximal tension was obtained during the twitch). Then, sciatic nerves were stimulated by pulses of 50–200 Hz, and the absolute maximal force was measured. The specific maximal force was determined by dividing the absolute muscle force on the TA weight.

### Protein Extraction and Western Blot

TA cryosections or transfected HEK293T cells were lysed in radio immunoprecipitation assay (RIPA) buffer supplemented with PMSF 1 mM and complete mini EDTA-free protease inhibitor cocktail (Roche Diagnostic). Protein concentrations were determined with the Bio-Rad Protein Assay Kit. Samples were denatured at 95°C for 5 min. Then, 20  $\mu$ g of protein was loaded in buffer containing 50 mM Tris-HCl, 2% SDS, and 10% glycerol, separated in 10% SDS-PAGE electrophoretic gel, and transferred on nitrocellulose membrane for 1.5 hr at 200 mA. Membranes were blocked for 2 hr in Tris-buffered saline (TBS) containing 5% non-fat dry milk and 0.1% Tween20 before an incubation for 2 hr with primary rabbit polyclonal antibodies against DNM2 (homemade antibody R2865; 1:500) or mouse antibody against GAPDH (1:100,000) diluted in blocking buffer containing 5% milk. Secondary antibodies coupled to horseradish peroxidase were goat anti-rabbit (for DNM2; 1:10,000) or goat anti-mouse (for GAPDH; 1:10,000) and were incubated overnight. Nitrocellulose membranes were visualized in Amersham Imager 600.

### Production and Purification of rAAV

Recombinant adeno-associated virus (rAAV)2/9 vectors were generated by a triple transfection of AAV-293 cell line with pAAV2 insert containing either *shRNA control* (scrambled sequence) or *shDnm2* (B, C, F, I, and J) under the control of the mouse U6 promoter, a GFP gene under the control of cytomegalovirus (CMV) promoter as a reporter and flanked by serotype-2 inverted terminal repeats, pXR1 containing rep and cap genes of AAV serotype-9, and pHelper encoding the adenovirus helper functions. Cell lysates were subjected to 3 rounds of freeze/thaw and then treated with 50 U/mL Benzonase (Sigma) for 30 min at 37°C and clarified by centrifugation. Viral vectors were purified by iodixanol gradient ultracentrifugation followed by dialysis and concentration against Dulbecco's phosphate-buffered saline (DPBS) using centrifugal filters (Amicon Ultra-15 Centrifugal Filter Devices 30K). Physical particles were quantified by real-time PCR, and titers are expressed as viral genomes per mL (vg/mL).

### RNA Extraction and qRT-PCR

Total RNA was isolated from transfected HEK293T or C2C12 cells using TRIzol reagent according to the manufacturer's instruction (Invitrogen, UK). RT-PCR was carried out on 1–1.5  $\mu$ g aliquot using SuperscriptII Reverse Transcriptase (Thermo Fisher Scientific). qRT-PCR was performed in Lightcycler 480 (Roche) using *Dnm2* (F): CCAACAAAGGCATCTCCCCT, *Dnm2* (R): TGGTGAGTAG ACCCGAAGGT, *Hprt*(F): GTAATGATCAGTCAACGGGGG-AC, and *Hprt* (R): CCAGCAAGCTTGCAACCTTAACCA mixed in SybrGreen (QIAGEN).

## Statistical Analysis

For *in vitro* studies,  $n = 3$  biological replicates. Bar charts depict mean  $\pm$  SEM. For *in vivo* studies,  $n = 5$ –8 were used. Curves and graphs were made using GraphPad Prism software. Difference between groups was analyzed by *t* test or two-way ANOVA followed by post hoc Bonferroni.

## SUPPLEMENTAL INFORMATION

Supplemental Information includes four figures and can be found with this article online at <https://doi.org/10.1016/j.jymthe.2018.02.008>.

## AUTHOR CONTRIBUTIONS

Conceptualization, B.S.C. and J.L.; Investigation, H.T.; Resources, V.M.L., C.K., P.K., N.M., and D.B.; Writing – Original Draft, H.T.; Writing – Review & Editing, B.S.C. and J.L.

## CONFLICTS OF INTEREST

H.T., J.L., and B.S.C. are inventors of a patent on targeting *DNM2* for the treatment of centronuclear myopathies. J.L. and B.S.C. are scientific advisors for Dynacure.

## ACKNOWLEDGMENTS

We thank Pascal Kessler, William Magnant, and Olivia Wendling for excellent technical assistance and Julie Johnston (Penn Vector Core at University of Pennsylvania) for providing pAAV2/9 plasmid. This study was supported by ANR-10-LABX-0030-INRT, a French state fund managed by the Agence Nationale de la Recherche under the frame program Investissements d'Avenir ANR-10-IDEX-0002-02, ANR-14-CE12-0009, Myotubular Trust and Sparks the Children's Medical Research Charity, Association Française contre les Myopathies (AFM 20323), and the SATT Alsace Conectus. H.T. was supported by a MRT fellowship.

## REFERENCES

- Romero, N.B. (2010). Centronuclear myopathies: a widening concept. *Neuromuscul. Disord.* 20, 223–228.
- Jungbluth, H., Wallgren-Pettersson, C., and Laporte, J. (2008). Centronuclear (myotubular) myopathy. *Orphanet J. Rare Dis.* 3, 26.
- Spiro, A.J., Shy, G.M., and Gonatas, N.K. (1966). Myotubular myopathy. Persistence of fetal muscle in an adolescent boy. *Arch. Neurol.* 14, 1–14.
- Laporte, J., Hu, L.J., Kretz, C., Mandel, J.L., Kioschis, P., Coy, J.F., Klauck, S.M., Poustka, A., and Dahl, N. (1996). A gene mutated in X-linked myotubular myopathy defines a new putative tyrosine phosphatase family conserved in yeast. *Nat. Genet.* 13, 175–182.
- Laporte, J., Kress, W., and Mandel, J.L. (2001). Diagnosis of X-linked myotubular myopathy by detection of myotubularin. *Ann. Neurol.* 50, 42–46.
- Buj-Bello, A., Biancalana, V., Moutou, C., Laporte, J., and Mandel, J.L. (1999). Identification of novel mutations in the MTM1 gene causing severe and mild forms of X-linked myotubular myopathy. *Hum. Mutat.* 14, 320–325.
- Laporte, J., Biancalana, V., Tanner, S.M., Kress, W., Schneider, V., Wallgren-Pettersson, C., Herger, F., Buj-Bello, A., Blondeau, F., Liechti-Gallati, S., and Mandel, J.L. (2000). MTM1 mutations in X-linked myotubular myopathy. *Hum. Mutat.* 15, 393–409.
- Tsai, T.C., Horinouchi, H., Noguchi, S., Minami, N., Murayama, K., Hayashi, Y.K., Nonaka, I., and Nishino, I. (2005). Characterization of MTM1 mutations in 31

Japanese families with myotubular myopathy, including a patient carrying 240 kb deletion in Xq28 without male hypogonadism. *Neuromuscul. Disord.* 15, 245–252.

- Tosch, V., Vasli, N., Kretz, C., Nicot, A.S., Gasnier, C., Dondaine, N., Oriot, D., Barth, M., Puissant, H., Romero, N.B., et al. (2010). Novel molecular diagnostic approaches for X-linked centronuclear (myotubular) myopathy reveal intronic mutations. *Neuromuscul. Disord.* 20, 375–381.
- Tsujita, K., Itoh, T., Ijuin, T., Yamamoto, A., Shisheva, A., Laporte, J., and Takenawa, T. (2004). Myotubularin regulates the function of the late endosome through the gram domain-phosphatidylinositol 3,5-bisphosphate interaction. *J. Biol. Chem.* 279, 13817–13824.
- Al-Qusairi, L., Weiss, N., Toussaint, A., Berbey, C., Messaddeq, N., Kretz, C., Sanoudou, D., Beggs, A.H., Allard, B., Mandel, J.L., et al. (2009). T-tubule disorganization and defective excitation-contraction coupling in muscle fibers lacking myotubularin lipid phosphatase. *Proc. Natl. Acad. Sci. USA* 106, 18763–18768.
- Dowling, J.J., Vreede, A.P., Low, S.E., Gibbs, E.M., Kuwada, J.Y., Bonnemant, C.G., and Feldman, E.L. (2009). Loss of myotubularin function results in T-tubule disorganization in zebrafish and human myotubular myopathy. *PLoS Genet.* 5, e1000372.
- Hnia, K., Tronçère, H., Tomczak, K.K., Amoasii, L., Schultz, P., Beggs, A.H., Payrastre, B., Mandel, J.L., and Laporte, J. (2011). Myotubularin controls desmin intermediate filament architecture and mitochondrial dynamics in human and mouse skeletal muscle. *J. Clin. Invest.* 121, 70–85.
- Robb, S.A., Sewry, C.A., Dowling, J.J., Feng, L., Cullup, T., Lillis, S., Abbs, S., Lees, M.M., Laporte, J., Manzur, A.Y., et al. (2011). Impaired neuromuscular transmission and response to acetylcholinesterase inhibitors in centronuclear myopathies. *Neuromuscul. Disord.* 21, 379–386.
- Dowling, J.J., Joubert, R., Low, S.E., Durban, A.N., Messaddeq, N., Li, X., Dulin-Smith, A.N., Snyder, A.D., Marshall, M.L., Marshall, J.T., et al. (2012). Myotubular myopathy and the neuromuscular junction: a novel therapeutic approach from mouse models. *Dis. Model. Mech.* 5, 852–859.
- Lawlor, M.W., Alexander, M.S., Viola, M.G., Meng, H., Joubert, R., Gupta, V., Motohashi, N., Manfread, R.A., Hsu, C.P., Huang, P., et al. (2012). Myotubularin-deficient myoblasts display increased apoptosis, delayed proliferation, and poor cell engraftment. *Am. J. Pathol.* 181, 961–968.
- Lawlor, M.W., Viola, M.G., Meng, H., Edelstein, R.V., Liu, F., Yan, K., Luna, E.J., Lerch-Gaggl, A., Hoffmann, R.G., Pierson, C.R., et al. (2014). Differential muscle hypertrophy is associated with satellite cell numbers and Akt pathway activation following activin type IIB receptor inhibition in Mtm1 p.R69C mice. *Am. J. Pathol.* 184, 1831–1842.
- Al-Qusairi, L., Prokic, I., Amoasii, L., Kretz, C., Messaddeq, N., Mandel, J.L., and Laporte, J. (2013). Lack of myotubularin (MTM1) leads to muscle hypotrophy through unbalanced regulation of the autophagy and ubiquitin-proteasome pathways. *FASEB J.* 27, 3384–3394.
- Fetalvero, K.M., Yu, Y., Goetschkes, M., Liang, G., Valdez, R.A., Gould, T., Triantafellow, E., Bergling, S., Loureiro, J., Eash, J., et al. (2013). Defective autophagy and mTORC1 signaling in myotubularin null mice. *Mol. Cell. Biol.* 33, 98–110.
- Bitoun, M., Maugendre, S., Jeannot, P.Y., Lacène, E., Ferrer, X., Laforêt, P., Martin, J.J., Laporte, J., Lochmüller, H., Beggs, A.H., et al. (2005). Mutations in dynamin 2 cause dominant centronuclear myopathy. *Nat. Genet.* 37, 1207–1209.
- Böhm, J., Biancalana, V., Dechene, E.T., Bitoun, M., Pierson, C.R., Schaefer, E., Karasoy, H., Dempsey, M.A., Klein, F., Dondaine, N., et al. (2012). Mutation spectrum in the large GTPase dynamin 2, and genotype-phenotype correlation in autosomal dominant centronuclear myopathy. *Hum. Mutat.* 33, 949–959.
- Warnock, D.E., Baba, T., and Schmid, S.L. (1997). Ubiquitously expressed dynamin-II has a higher intrinsic GTPase activity and a greater propensity for self-assembly than neuronal dynamin-I. *Mol. Biol. Cell* 8, 2553–2562.
- Di, A., Nelson, D.J., Bindokas, V., Brown, M.E., Libunao, F., and Palfrey, H.C. (2003). Dynamin regulates focal exocytosis in phagocytosing macrophages. *Mol. Biol. Cell* 14, 2016–2028.
- Arneson, L.N., Segovis, C.M., Gomez, T.S., Schoon, R.A., Dick, C.J., Lou, Z., Billadeau, D.D., and Leibson, P.J. (2008). Dynamin 2 regulates granule exocytosis during NK cell-mediated cytotoxicity. *J. Immunol.* 181, 6995–7001.

25. McNiven, M.A., Kim, L., Krueger, E.W., Orth, J.D., Cao, H., and Wong, T.W. (2000). Regulated interactions between dynamin and the actin-binding protein cortactin modulate cell shape. *J. Cell Biol.* 151, 187–198.
26. Mooren, O.L., Kotova, T.I., Moore, A.J., and Schafer, D.A. (2009). Dynamin2 GTPase and cortactin remodel actin filaments. *J. Biol. Chem.* 284, 23995–24005.
27. Yamada, H., Takeda, T., Michiue, H., Abe, T., and Takei, K. (2016). Actin bundling by dynamin 2 and cortactin is implicated in cell migration by stabilizing filopodia in human non-small cell lung carcinoma cells. *Int. J. Oncol.* 49, 877–886.
28. Kenniston, J.A., and Lemmon, M.A. (2010). Dynamin GTPase regulation is altered by PH domain mutations found in centronuclear myopathy patients. *EMBO J.* 29, 3054–3067.
29. Wang, L., Barylko, B., Byers, C., Ross, J.A., Jameson, D.M., and Albanesi, J.P. (2010). Dynamin 2 mutants linked to centronuclear myopathies form abnormally stable polymers. *J. Biol. Chem.* 285, 22753–22757.
30. Cowling, B.S., Toussaint, A., Amoasii, L., Koebel, P., Ferry, A., Davignon, L., Nishino, I., Mandel, J.L., and Laporte, J. (2011). Increased expression of wild-type or a centronuclear myopathy mutant of dynamin 2 in skeletal muscle of adult mice leads to structural defects and muscle weakness. *Am. J. Pathol.* 178, 2224–2235.
31. Liu, N., Bezprozvannaya, S., Shelton, J.M., Frisard, M.I., Hulver, M.W., McMillan, R.P., Wu, Y., Voelker, K.A., Grange, R.W., Richardson, J.A., et al. (2011). Mice lacking microRNA 133a develop dynamin 2-dependent centronuclear myopathy. *J. Clin. Invest.* 121, 3258–3268.
32. Buj-Bello, A., Laugel, V., Messaddeq, N., Zahreddine, H., Laporte, J., Pellissier, J.F., and Mandel, J.L. (2002). The lipid phosphatase myotubularin is essential for skeletal muscle maintenance but not for myogenesis in mice. *Proc. Natl. Acad. Sci. USA* 99, 15060–15065.
33. Childers, M.K., Joubert, R., Poulard, K., Moal, C., Grange, R.W., Doering, J.A., Lawlor, M.W., Rider, B.E., Jamet, T., Danièle, N., et al. (2014). Gene therapy prolongs survival and restores function in murine and canine models of myotubular myopathy. *Sci. Transl. Med.* 6, 220ra10.
34. Buj-Bello, A., Fougere, F., Schwab, Y., Messaddeq, N., Spehner, D., Pierson, C.R., Durand, M., Kretz, C., Danos, O., Douar, A.M., et al. (2008). AAV-mediated intramuscular delivery of myotubularin corrects the myotubular myopathy phenotype in targeted murine muscle and suggests a function in plasma membrane homeostasis. *Hum. Mol. Genet.* 17, 2132–2143.
35. Tasfaout, H., Buono, S., Guo, S., Kretz, C., Messaddeq, N., Booten, S., Greenlee, S., Monia, B.P., Cowling, B.S., and Laporte, J. (2017). Antisense oligonucleotide-mediated Dnm2 knockdown prevents and reverts myotubular myopathy in mice. *Nat. Commun.* 8, 15661.
36. Cowling, B.S., Chevremont, T., Prokic, I., Kretz, C., Ferry, A., Coirault, C., Koutsopoulos, O., Laugel, V., Romero, N.B., and Laporte, J. (2014). Reducing dynamin 2 expression rescues X-linked centronuclear myopathy. *J. Clin. Invest.* 124, 1350–1363.
37. Sabha, N., Volpatti, J.R., Gonorazky, H., Reifler, A., Davidson, A.E., Li, X., Eltayeb, N.M., Dall'Armi, C., Di Paolo, G., Brooks, S.V., et al. (2016). PIK3C2B inhibition improves function and prolongs survival in myotubular myopathy animal models. *J. Clin. Invest.* 126, 3613–3625.
38. Samulski, R.J., and Muzyczka, N. (2014). AAV-mediated gene therapy for research and therapeutic purposes. *Annu. Rev. Virol.* 1, 427–451.
39. Koornneef, A., Maczuga, P., van Logtenstein, R., Borel, F., Blits, B., Ritsema, T., van Deventer, S., Petry, H., and Konstantinova, P. (2011). Apolipoprotein B knockdown by AAV-delivered shRNA lowers plasma cholesterol in mice. *Mol. Ther.* 19, 731–740.
40. Grimm, D., Pandey, K., and Kay, M.A. (2005). Adeno-associated virus vectors for short hairpin RNA expression. *Methods Enzymol.* 392, 381–405.
41. Yang, Q., Tang, Y., Imbrogno, K., Lu, A., Proto, J.D., Chen, A., Guo, F., Fu, F.H., Huard, J., and Wang, B. (2012). AAV-based shRNA silencing of NF- $\kappa$ B ameliorates muscle pathologies in mdx mice. *Gene Ther.* 19, 1196–1204.
42. Saal, K.A., Koch, J.C., Tatenhorst, L., Szegő, E.M., Ribas, V.T., Michel, U., Bähr, M., Tönges, L., and Lingor, P. (2015). AAV-shRNA-mediated downregulation of ROCK2 attenuates degeneration of dopaminergic neurons in toxin-induced models of Parkinson's disease in vitro and in vivo. *Neurobiol. Dis.* 73, 150–162.
43. Koo, T., Malerba, A., Athanasopoulos, T., Trollet, C., Boldrin, L., Ferry, A., Popplewell, L., Foster, H., Foster, K., and Dickson, G. (2011). Delivery of AAV2/9-microdystrophin genes incorporating helix 1 of the coiled-coil motif in the C-terminal domain of dystrophin improves muscle pathology and restores the level of  $\alpha$ 1-syntrophin and  $\alpha$ -dystrobrevin in skeletal muscles of mdx mice. *Hum. Gene Ther.* 22, 1379–1388.
44. Agbulut, O., Huet, A., Niederländer, N., Puceat, M., Menasché, P., and Coirault, C. (2007). Green fluorescent protein impairs actin-myosin interactions by binding to the actin-binding site of myosin. *J. Biol. Chem.* 282, 10465–10471.
45. Agbulut, O., Coirault, C., Niederländer, N., Huet, A., Vicart, P., Hagège, A., Puceat, M., and Menasché, P. (2006). GFP expression in muscle cells impairs actin-myosin interactions: implications for cell therapy. *Nat. Methods* 3, 331.
46. Lawlor, M.W., Beggs, A.H., Buj-Bello, A., Childers, M.K., Dowling, J.J., James, E.S., Meng, H., Moore, S.A., Prasad, S., Schoser, B., and Sewry, C.A. (2016). Skeletal muscle pathology in X-linked myotubular myopathy: review with cross-species comparisons. *J. Neuropathol. Exp. Neurol.* 75, 102–110.
47. Beggs, A.H., Böhm, J., Snead, E., Kozłowski, M., Maurer, M., Minor, K., Childers, M.K., Taylor, S.M., Hitt, C., Mickelson, J.R., et al. (2010). MTM1 mutation associated with X-linked myotubular myopathy in Labrador Retrievers. *Proc. Natl. Acad. Sci. USA* 107, 14697–14702.
48. Zincarelli, C., Soltys, S., Rengo, G., and Rabinowitz, J.E. (2008). Analysis of AAV serotypes 1–9 mediated gene expression and tropism in mice after systemic injection. *Mol. Ther.* 16, 1073–1080.
49. Salva, M.Z., Himeda, C.L., Tai, P.W., Nishiuchi, E., Gregorevic, P., Allen, J.M., Finn, E.E., Nguyen, Q.G., Blankinship, M.J., Meuse, L., et al. (2007). Design of tissue-specific regulatory cassettes for high-level rAAV-mediated expression in skeletal and cardiac muscle. *Mol. Ther.* 15, 320–329.
50. Rivera, V.M., Gao, G.P., Grant, R.L., Schnell, M.A., Zoltick, P.W., Rozamus, L.W., Clackson, T., and Wilson, J.M. (2005). Long-term pharmacologically regulated expression of erythropoietin in primates following AAV-mediated gene transfer. *Blood* 105, 1424–1430.
51. Husain, T., Passini, M.A., Parente, M.K., Fraser, N.W., and Wolfe, J.H. (2009). Long-term AAV vector gene and protein expression in mouse brain from a small pan-cellular promoter is similar to neural cell promoters. *Gene Ther.* 16, 927–932.
52. Penaud-Budloo, M., Le Guiner, C., Nowrouzi, A., Toromanoff, A., Chérel, Y., Chenuaud, P., Schmidt, M., von Kalle, C., Rolling, F., Moullier, P., and Snyder, R.O. (2008). Adeno-associated virus vector genomes persist as episomal chromatin in primate muscle. *J. Virol.* 82, 7875–7885.
53. Nathwani, A.C., Tuddenham, E.G., Rangarajan, S., Rosales, C., McIntosh, J., Linch, D.C., Chowdhury, P., Riddell, A., Pie, A.J., Harrington, C., et al. (2011). Adenovirus-associated virus vector-mediated gene transfer in hemophilia B. *N. Engl. J. Med.* 365, 2357–2365.
54. Nowrouzi, A., Penaud-Budloo, M., Kaepfel, C., Appelt, U., Le Guiner, C., Moullier, P., von Kalle, C., Snyder, R.O., and Schmidt, M. (2012). Integration frequency and intermolecular recombination of rAAV vectors in non-human primate skeletal muscle and liver. *Mol. Ther.* 20, 1177–1186.
55. Arnett, A.L., Konieczny, P., Ramos, J.N., Hall, J., Odom, G., Yablonska-Reuveni, Z., Chamberlain, J.R., and Chamberlain, J.S. (2014). Adeno-associated viral (AAV) vectors do not efficiently target muscle satellite cells. *Mol. Ther. Methods Clin. Dev.* 1, 14038.
56. Yi, R., Doehle, B.P., Qin, Y., Macara, I.G., and Cullen, B.R. (2005). Overexpression of exportin 5 enhances RNA interference mediated by short hairpin RNAs and microRNAs. *RNA* 11, 220–226.
57. Hutvagner, G., Simard, M.J., Mello, C.C., and Zamore, P.D. (2004). Sequence-specific inhibition of small RNA function. *PLoS Biol.* 2, E98.
58. Grimm, D., Streetz, K.L., Jopling, C.L., Storm, T.A., Pandey, K., Davis, C.R., Marion, P., Salazar, F., and Kay, M.A. (2006). Fatality in mice due to oversaturation of cellular microRNA/short hairpin RNA pathways. *Nature* 441, 537–541.
59. Giering, J.C., Grimm, D., Storm, T.A., and Kay, M.A. (2008). Expression of shRNA from a tissue-specific pol II promoter is an effective and safe RNAi therapeutic. *Mol. Ther.* 16, 1630–1636.

## **Supplemental Information**

### **Single Intramuscular Injection of AAV-shRNA**

### **Reduces DNM2 and Prevents Myotubular**

### **Myopathy in Mice**

**Hichem Tasfaout, Valentina M. Lionello, Christine Kretz, Pascale Koebel, Nadia Messaddeq, Deborah Bitz, Jocelyn Laporte, and Belinda S. Cowling**

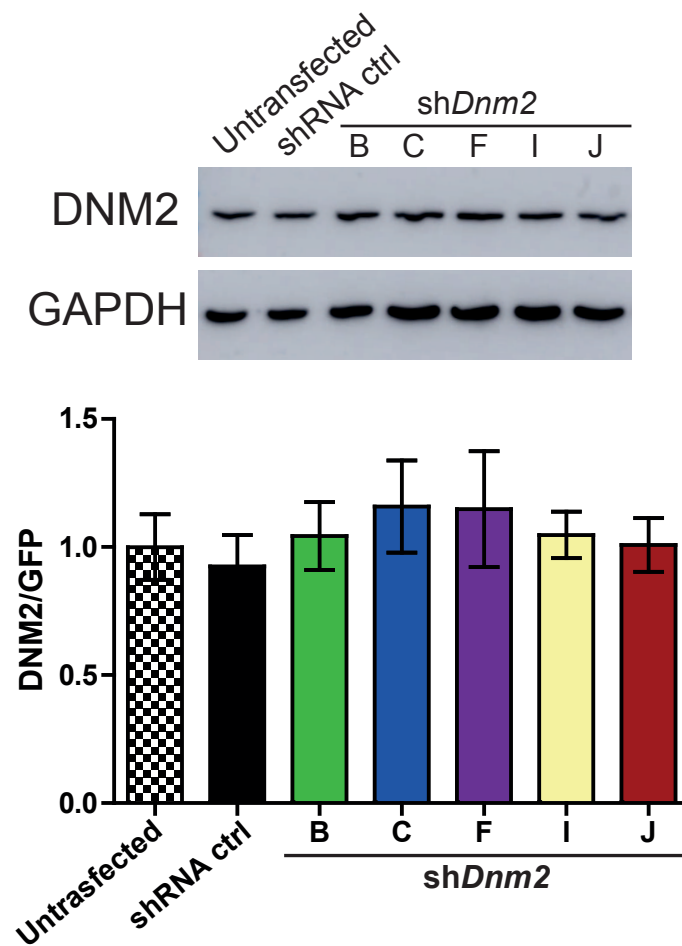

**Supplemental figure S1: *In vitro* validation of shRNA targeting *Dnm2*.**

Representative western blot from shRNA-treated C2C12 mouse myoblast. Cells were electroporated with shRNA ctrl, or sh*Dnm2* (B, C, F, I or J). DNM2 protein levels was determined by densitometry and standardized to GAPDH.  $n=3$  per each group. Data represent an average of three independent experiments  $\pm$  SEM.

*Mtm1*KO muscle injected with sh*Dnm2* #C

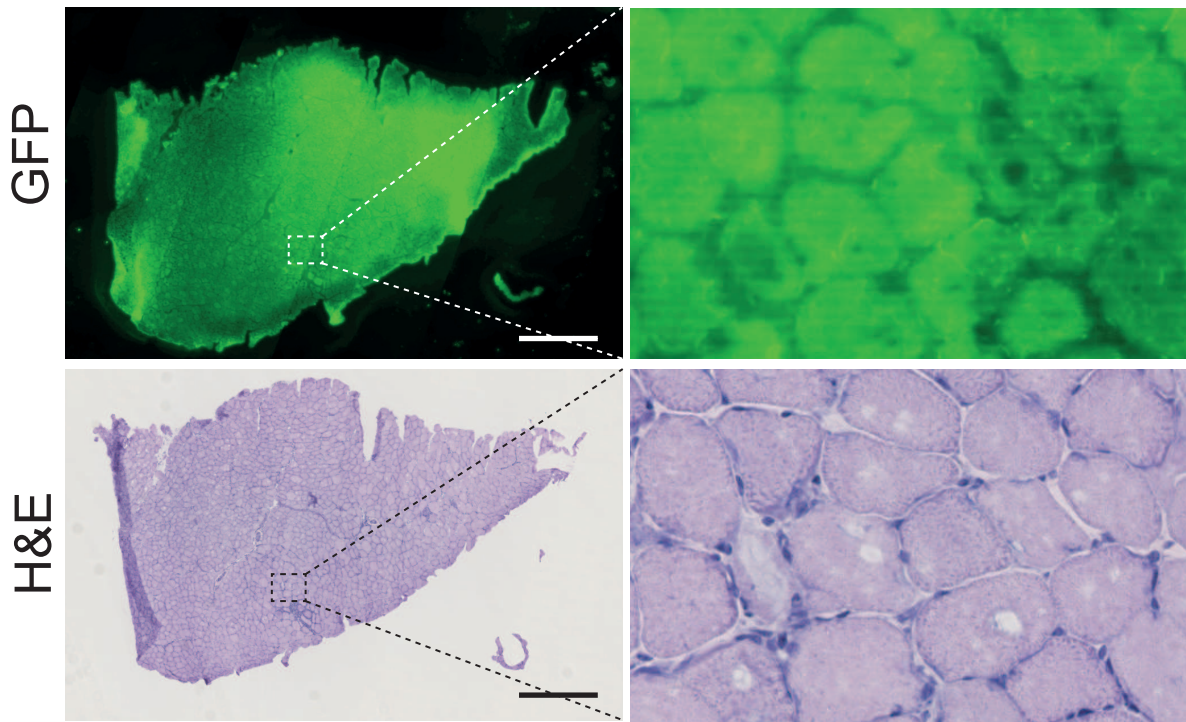

**Supplemental figure S2: GFP expression and H&E staining of serial sections at 4 weeks after AAV-sh*Dnm2* injection.** Heterogeneous GFP expression was visualized on 8µm TA cross section of 7-weeks old *Mtm1*KO.

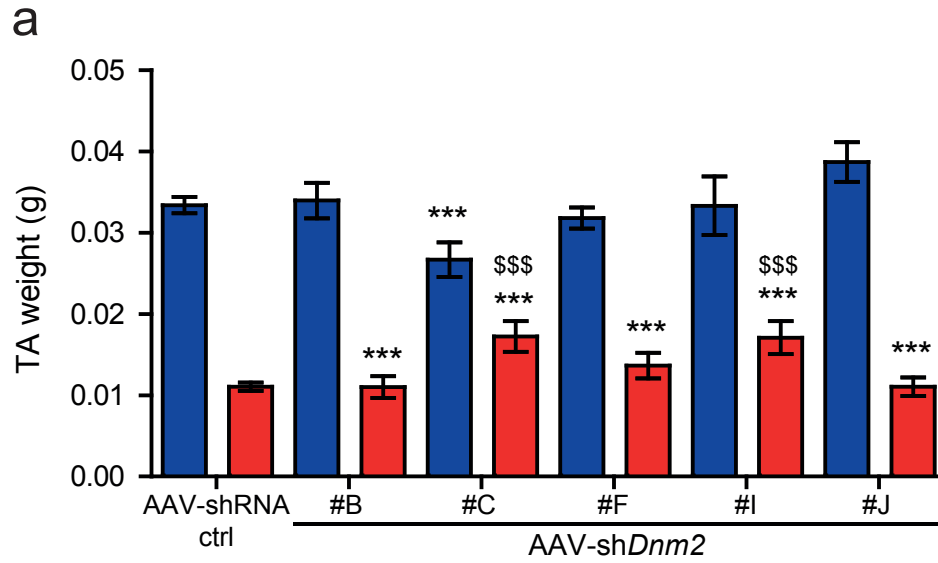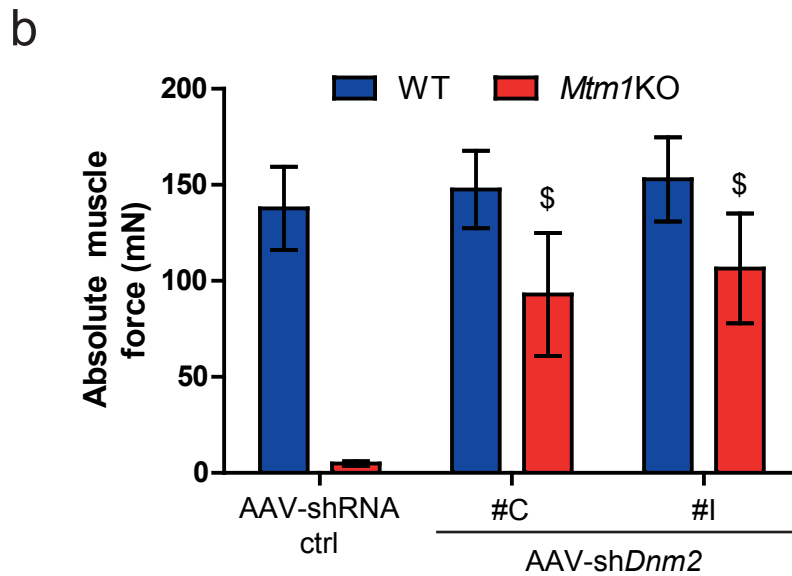

**Supplemental Figure S3: Positive effects of AAV shRNA-mediated *Dnm2* knockdown on *Mtm1*KO muscle mass and absolute force.**

4 weeks after AAV-sh*Dnm2* #C or #I injections, improvements in absolute muscle mass (a) and muscle maximal force (measured at 150 Hz) (b) were noted in *Mtm1*KO muscles. n=5-7 mice/group, \*\*\*p<0.001 vs WT TA treated with shRNA ctrl. \$p<0.05, \$\$\$p<0.01 *Mtm1*KO treated with AAV-sh*Dnm2* vs *Mtm1*KO treated with AAV-shRNA ctrl (ANOVA test).

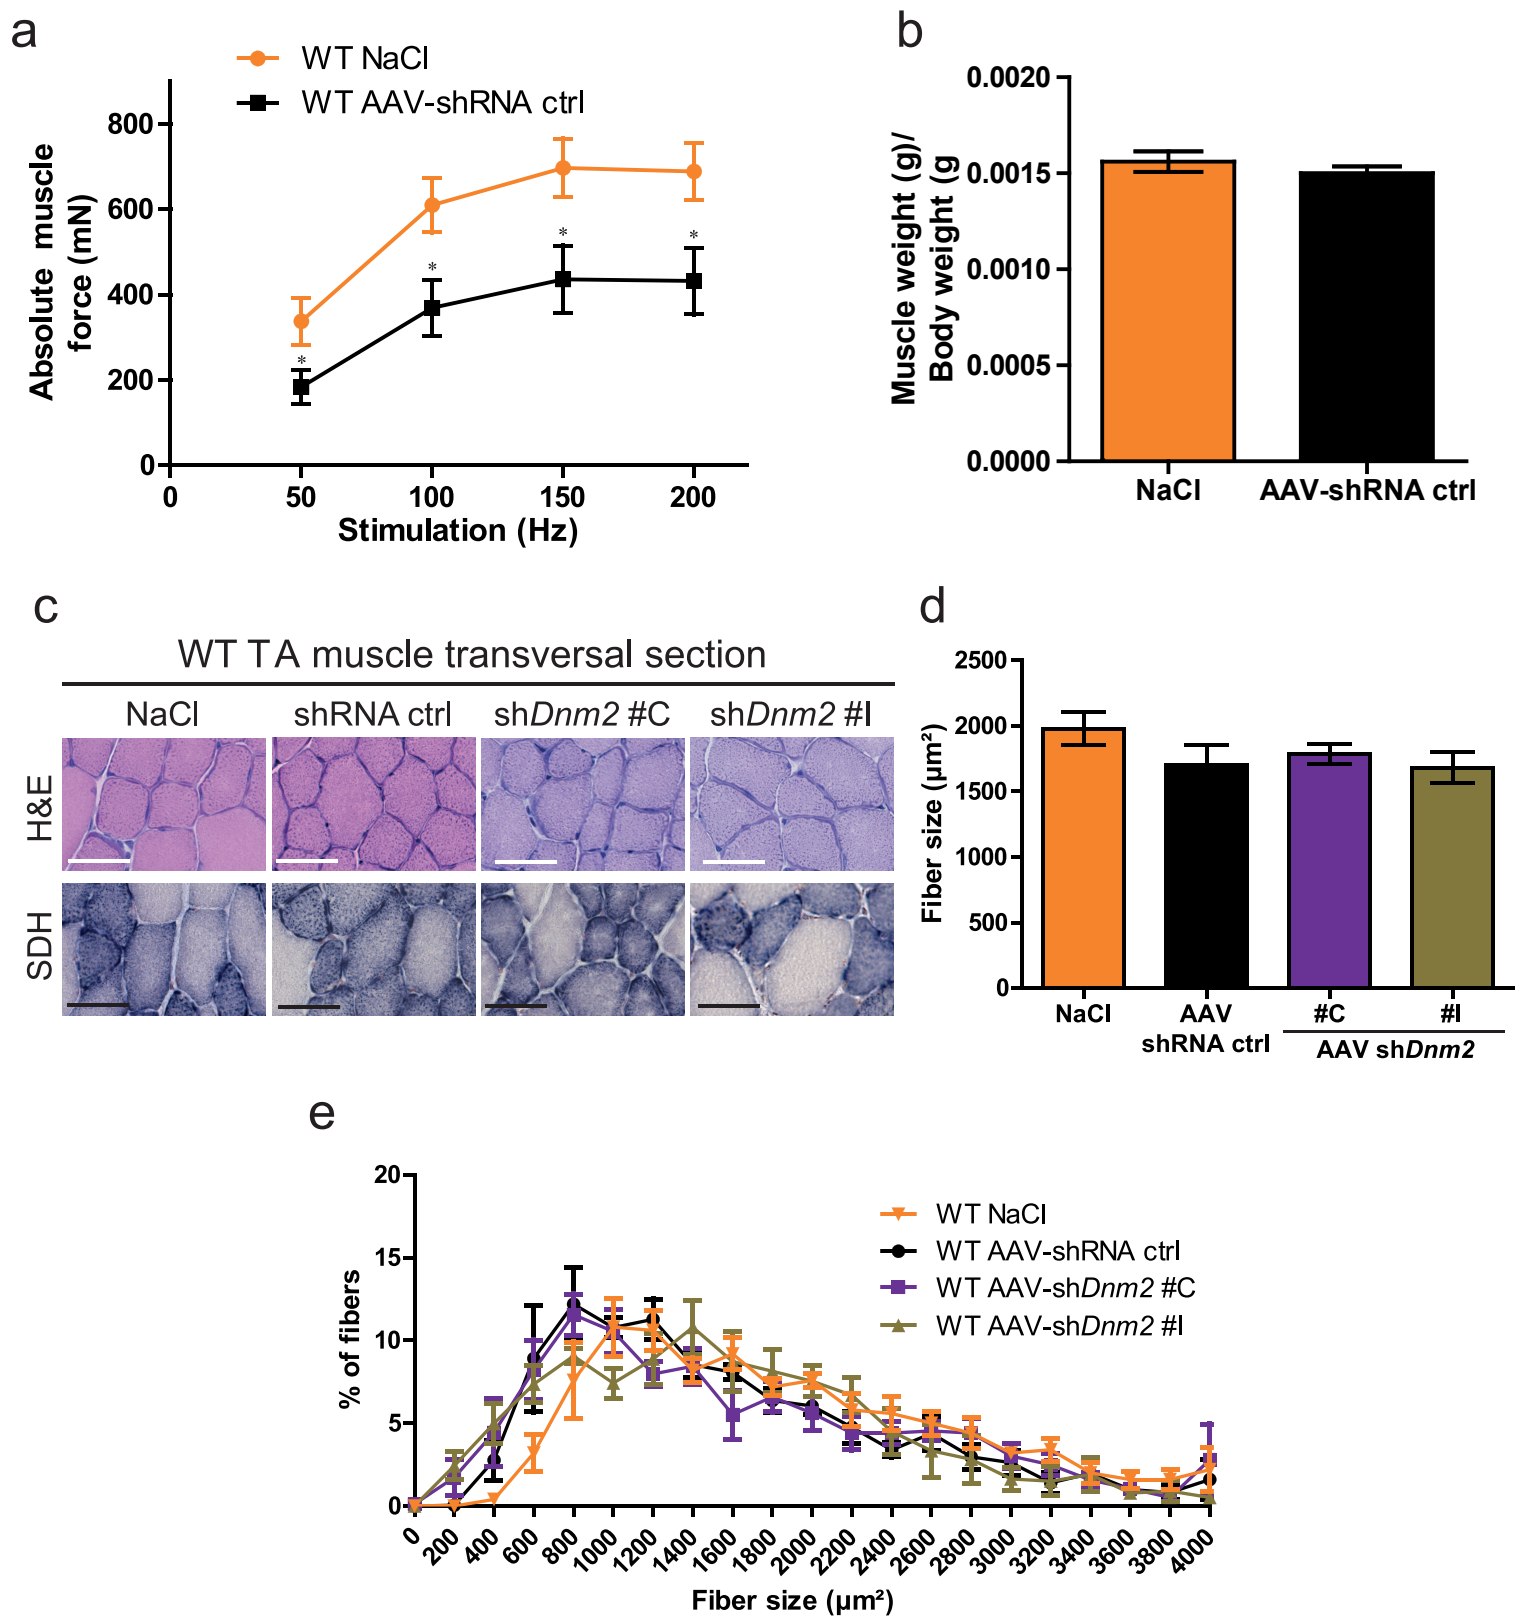

**Supplemental figure S4: Characterization of AAV-shRNA ctrl and AAV-shDnm2 impact on muscle mass, force and histology.** (a) TA muscle of WT mice treated with NaCl or AAV-shRNA ctrl were weighed 4 weeks after a single injection. (b) Absolute muscle forces of TA muscle were recorded after sciatic nerve stimulation with 50, 100, 150 and 200Hz.  $n=5-7$  mice/group. (c) TA muscle sections of WT mice treated with AAV-shRNA ctrl, AAV-shDnm2 (#C or #I) or NaCl were stained with H&E and SDH to visualize fiber size, shape, nuclei positioning and mitochondrial distribution (scale bars: 50μm). (d) Myofiber area was calculated on 300-400 fibers per sample. (e) Fiber size distribution of WT TA muscles according to size groups.  $n=5$  mice/group. \* $p<0.05$  vs WT TA treated with NaCl ( $t$ -test).
